# Supplementary material
Source: ML conference proceedings conference paper supplement (https://proceedings.mlr.press/v139/geffner21a.html)
Supplement: Supplementary file 2 [file geffner21a-supp.zip]

Archive with 18 entries (14 files):
- main.pdf
- __MACOSX/
- __MACOSX/._main.pdf
- code_icml/
- code_icml/.DS_Store
- __MACOSX/code_icml/
- __MACOSX/code_icml/._.DS_Store
- code_icml/models.py
- __MACOSX/code_icml/._models.py
- code_icml/datasets/
- code_icml/datasets/.DS_Store
- code_icml/datasets/australian_scale
- code_icml/batch_q.py
- __MACOSX/code_icml/._batch_q.py
- code_icml/main_gaussian.py
- __MACOSX/code_icml/._main_gaussian.py
- code_icml/main_nongaussian.py
- __MACOSX/code_icml/._main_nongaussian.py
