# Supplementary material
Source: ML conference proceedings conference paper supplement (https://proceedings.mlr.press/v139/geffner21a.html)
Supplement: Supplementary file 2 [file geffner21a-supp.zip › code_icml/datasets/australian_scale]

-1 1:1 2:-0.749474 3:-0.181429 5:-0.538462 6:-0.25 7:-0.888772 8:-1 9:-1 10:-1 11:1 13:-0.9 14:-0.97576 
-1 1:-1 2:-0.731729 3:-0.5 5:0.0769231 6:-0.25 7:-0.988421 8:-1 9:-1 10:-1 11:-1 13:-0.84 14:-1 
-1 1:-1 2:-0.52391 3:-0.875 4:-1 5:-0.538462 6:-0.25 7:-0.912281 8:-1 9:-1 10:-1 11:1 13:-0.72 14:-1 
+1 1:-1 2:-0.761805 3:-0.178571 4:-1 5:-0.384615 6:-0.5 7:-1 8:1 9:1 10:-0.671642 11:1 13:-1 14:-1 
+1 1:1 2:-0.806917 3:-0.416429 5:-0.230769 6:-0.25 7:-0.862456 8:1 9:1 10:-0.58209 11:-1 13:-0.94 14:-0.99684 
+1 1:-1 2:-0.937444 3:-0.958214 5:0.0769231 6:0.75 7:-0.894737 8:1 9:1 10:-0.940299 11:-1 13:-0.9 14:-1 
-1 1:1 2:-0.889624 3:-0.535714 5:-0.692308 6:-0.25 7:-0.991228 8:-1 9:-1 10:-1 11:-1 13:-0.94 14:-0.998 
+1 1:-1 2:0.350977 3:-0.681429 5:0.538462 6:0.75 7:-0.786667 8:1 9:1 10:-0.820896 11:-1 13:-0.957 14:-0.9888 
-1 1:1 2:-0.576541 3:-0.928571 4:-1 5:-0.846154 6:0.75 7:-0.789474 8:-1 9:-1 10:-1 11:-1 13:-0.824 14:-0.98926 
-1 1:-1 2:0.263158 3:-0.494286 5:-0.538462 6:0.75 7:-0.526316 8:1 9:1 10:-0.910448 11:1 13:-0.9 14:-0.999 
+1 1:1 2:-0.406015 3:-0.875 5:1 6:0.75 7:-0.684211 8:1 9:1 10:-0.880597 11:1 13:-0.747 14:-0.98286 
+1 1:1 2:-0.16782 3:-0.642857 5:0.538462 6:0.75 7:-0.649123 8:1 9:1 10:-0.820896 11:1 13:-0.53 14:-1 
-1 1:1 2:-0.79188 3:-0.910714 4:-1 5:0.0769231 6:0.75 7:-0.903509 8:1 9:1 10:-0.910448 11:1 13:-0.86 14:-0.9958 
+1 1:1 2:-0.363308 3:-0.642857 5:1 6:0.75 7:-0.473684 8:1 9:1 10:-0.820896 11:1 13:-1 14:-0.98 
-1 1:1 2:0.348271 3:-0.806429 5:0.0769231 6:-0.25 7:-0.830526 8:-1 9:-1 10:-1 11:1 13:-0.68 14:-1 
+1 1:1 2:0.0324813 3:-0.568571 5:-0.538462 6:-0.25 7:-0.997193 8:-1 9:-1 10:-1 11:-1 13:-1 14:-0.9462 
+1 1:1 2:-0.52391 3:-0.678571 5:0.230769 6:-0.25 7:-0.473684 8:1 9:1 10:-0.940299 11:1 13:-0.67 14:-1 
+1 1:-1 2:-0.844511 3:-0.357143 5:-0.230769 6:-0.25 7:-0.947368 8:1 9:1 10:-0.940299 11:-1 13:-0.912 14:-0.98818 
-1 1:1 2:-0.81203 3:-0.910714 4:-1 5:-0.538462 6:-0.25 7:-0.991228 8:-1 9:-1 10:-1 11:-1 13:-0.86 14:-0.99992 
+1 1:-1 2:-0.739248 3:-0.595357 5:0.538462 6:-0.25 7:-0.818596 8:1 9:1 10:-0.791045 11:-1 13:-0.871 14:-0.93486 
-1 1:-1 2:-0.566316 3:-0.958214 5:-0.230769 6:-0.25 7:-0.997193 8:-1 9:-1 10:-1 11:-1 13:-0.74 14:-0.97992 
-1 1:-1 2:-0.836992 3:-0.958214 4:-1 5:-0.230769 6:-0.25 7:-0.958947 8:1 9:-1 10:-1 11:1 13:-0.84 14:-1 
-1 1:1 2:-0.175338 3:-0.904643 5:-0.846154 6:-0.25 7:-0.988421 8:-1 9:-1 10:-1 11:-1 13:-0.832 14:-1 
-1 1:1 2:-0.163007 3:-0.875 5:-0.538462 6:-0.25 7:-0.985263 8:1 9:-1 10:-1 11:-1 13:-0.84 14:-1 
-1 1:1 2:-0.827068 3:-0.315357 5:-0.230769 6:-0.25 7:-0.944561 8:-1 9:-1 10:-1 11:-1 13:-0.92 14:-0.993 
+1 1:1 2:-0.428571 3:-0.892857 5:0.846154 6:0.75 7:-0.614035 8:1 9:1 10:-0.910448 11:1 13:-1 14:-1 
-1 1:1 2:-0.736842 3:-0.991071 4:-1 5:-0.538462 6:-0.25 7:-0.991228 8:-1 9:-1 10:-1 11:-1 13:-0.8 14:-0.9986 
+1 1:1 2:-0.41594 3:-0.782857 4:-1 5:0.0769231 6:0.75 7:-0.856842 8:1 9:1 10:-0.970149 11:1 13:-0.82 14:-0.63946 
+1 1:-1 2:-0.491128 3:-0.142857 5:0.0769231 6:-0.25 7:-0.859649 8:1 9:1 10:-0.970149 11:-1 13:-0.78 14:-0.99962 
+1 1:1 2:-0.719398 3:-0.821429 5:0.0769231 6:-0.25 7:-0.92386 8:1 9:1 10:-0.671642 11:1 13:-0.94 14:-0.95632 
+1 1:1 2:-0.601504 3:-0.946429 5:0.0769231 6:0.75 7:-0.701754 8:1 9:1 10:-0.910448 11:1 13:-0.688 14:-0.997 
-1 1:-1 2:-0.799398 3:-0.25 4:-1 5:1 6:0.75 7:-1 8:-1 9:-1 10:-1 11:1 13:-0.846 14:-0.99936 
-1 1:1 2:0.160301 3:-0.901786 4:-1 5:0.0769231 6:0.75 7:-0.33614 8:1 9:-1 10:-1 11:1 13:-0.8 14:-0.998 
+1 1:1 2:-0.719398 3:-0.178571 5:0.230769 6:0.75 7:-0.850877 8:1 9:1 10:-0.671642 11:1 13:-0.71 14:-0.99432 
-1 1:1 2:-0.125413 3:-0.910714 5:-0.0769231 6:-0.25 7:-0.0263158 8:-1 9:1 10:-0.970149 11:1 13:-0.648 14:-0.99776 
-1 1:1 2:0.836993 3:0.357143 4:-1 5:-1 6:-1 7:-0.997193 8:-1 9:1 10:-0.940299 11:-1 13:-1 14:-0.99298 
+1 1:1 2:-0.661654 3:-0.107143 5:-0.230769 6:-0.25 7:-0.789474 8:1 9:-1 10:-1 11:1 12:-1 13:-0.98 14:-1 
+1 1:1 2:-0.223158 3:-0.00607143 5:0.230769 6:-0.25 7:-0.394737 8:1 9:1 10:-0.820896 11:1 13:-0.93 14:-1 
+1 1:-1 2:0.0225564 3:-0.428571 5:0.0769231 6:-0.25 7:-0.447368 8:1 9:1 10:-0.820896 11:1 13:-1 14:-0.9748 
+1 1:-1 2:0.0126315 3:-0.785714 5:1 6:-0.25 7:-0.0263158 8:1 9:1 10:-0.940299 11:1 13:-0.481 14:-0.96592 
+1 1:1 2:-0.716692 3:-1 5:0.846154 6:-0.25 7:-0.994035 8:1 9:-1 10:-1 11:-1 13:-1 14:-1 
-1 1:1 2:-0.734436 3:-0.892857 4:-1 5:-0.230769 6:-0.25 7:-0.962105 8:-1 9:-1 10:-1 11:1 13:-0.88 14:-0.99866 
+1 1:1 2:-0.609023 3:-0.919643 5:1 6:0.75 7:-0.912281 8:1 9:-1 10:-1 11:-1 13:-1 14:-0.89404 
-1 1:1 2:0.491128 3:-0.961429 5:0.0769231 6:-0.25 7:-0.958947 8:1 9:1 10:-0.910448 11:1 13:-0.82 14:-1 
-1 1:1 2:-0.699248 3:-0.970357 4:-1 5:0.0769231 6:-0.25 7:-0.997193 8:-1 9:1 10:-0.940299 11:-1 13:-0.872 14:-0.99988 
+1 1:-1 2:-0.789474 3:-0.267857 5:0.538462 6:-0.25 7:-0.950175 8:1 9:1 10:-0.940299 11:1 13:-0.951 14:-1 
-1 1:-1 2:-0.676692 3:-0.875 4:-1 5:0.0769231 6:-0.25 7:-0.988421 8:-1 9:-1 10:-1 11:-1 13:-0.868 14:-1 
+1 1:1 2:-0.927218 3:-0.997143 5:0.0769231 6:-0.25 7:-0.997193 8:-1 9:-1 10:-1 11:-1 13:-1 14:-1 
-1 1:-1 2:-0.526316 3:-0.857143 4:-1 5:0.384615 6:0.75 7:-0.859649 8:-1 9:-1 10:-1 11:-1 13:-0.744 14:-0.99966 
+1 1:-1 2:0.175338 3:0.0714286 5:0.0769231 6:-0.25 7:-0.614035 8:1 9:1 10:-0.58209 11:-1 13:-1 14:-0.956 
-1 1:1 2:-0.441203 3:-0.75 5:-0.538462 6:-0.25 7:-0.964912 8:-1 9:-1 10:-1 11:1 13:-0.768 14:-1 
-1 1:1 2:-0.779549 3:-0.705357 4:-1 5:-0.692308 6:0.75 7:-0.997193 8:-1 9:-1 10:-1 11:-1 13:-0.86 14:-0.998 
-1 1:1 2:-0.566316 3:-0.991071 4:-1 5:-0.538462 6:-0.25 7:-0.994035 8:-1 9:-1 10:-1 11:-1 13:-0.784 14:-0.958 
-1 1:1 2:-0.842105 3:-0.875 4:-1 5:0.0769231 6:-0.25 7:-0.83614 8:-1 9:-1 10:-1 11:1 13:-0.888 14:-0.99988 
-1 1:1 2:-0.58406 3:-0.767857 4:-1 5:0.538462 6:0.75 7:-0.643158 8:-1 9:1 10:-0.940299 11:1 13:-0.631 14:-0.99998 
+1 1:1 2:-0.576541 3:-0.892857 5:0.230769 6:-0.25 7:-0.859649 8:1 9:1 10:-0.671642 11:1 13:-0.566 14:-0.9993 
+1 1:1 2:-0.210526 3:-0.535714 5:-0.230769 7:-0.754386 8:1 9:1 10:-0.970149 11:-1 13:-1 14:-0.99 
-1 1:-1 2:-0.290827 3:-0.821429 5:-0.692308 6:0.75 7:-0.985263 8:-1 9:-1 10:-1 11:-1 13:-0.74 14:-0.99508 
+1 1:1 2:-0.135338 3:-0.648929 4:-1 5:0.230769 6:-0.25 7:-0.777895 8:1 9:-1 10:-1 11:1 13:-0.948 14:-0.97116 
+1 1:1 2:0.293233 3:-0.125 5:-0.0769231 6:-0.25 7:-0.912281 8:1 9:1 10:-0.880597 11:1 13:-0.8 14:-1 
-1 1:1 2:-0.115188 3:-0.642857 5:-0.692308 7:-0.842105 8:-1 9:-1 10:-1 11:1 13:-0.859 14:-1 
-1 1:-1 2:-0.699248 3:-0.949286 5:0.230769 6:-0.25 7:-0.982456 8:-1 9:1 10:-0.970149 11:1 13:-0.76 14:-0.99992 
+1 1:1 2:-0.857143 3:-0.857143 5:-0.692308 6:-0.25 7:-0.894737 8:1 9:1 10:-0.940299 11:-1 13:-0.88 14:-0.994 
-1 1:-1 2:-0.185564 3:-0.75 5:-0.692308 7:-0.964912 8:-1 9:-1 10:-1 11:-1 12:-1 13:0.16 14:-1 
+1 1:-1 2:-0.676692 3:-0.964286 5:0.538462 6:0.75 7:-0.894737 8:1 9:-1 10:-1 11:-1 13:-0.72 14:-0.98352 
+1 1:1 2:-0.150376 3:-0.300714 5:1 6:0.75 7:-0.441404 8:1 9:1 10:-0.761194 11:-1 13:-1 14:-1 
-1 1:-1 2:-0.827068 3:-0.988214 5:0.538462 6:-0.25 7:-0.997193 8:-1 9:-1 10:-1 11:1 13:-0.62 14:-1 
-1 1:1 2:-0.766917 3:-0.178571 5:-0.692308 6:-0.25 7:-0.964912 8:1 9:-1 10:-1 11:1 13:-0.9 14:-0.99864 
-1 1:1 2:-0.473684 3:-0.7975 5:-1 6:-1 7:-1 8:-1 9:1 10:-0.850746 11:-1 13:-0.824 14:-0.99708 
+1 1:1 2:-0.593985 3:-0.886786 5:0.846154 6:0.75 7:-0.871228 8:1 9:1 10:-0.641791 11:1 13:-0.417 14:-0.98574 
-1 1:1 2:0.0526316 3:0.881071 4:-1 5:-1 6:-1 7:-1 8:1 9:-1 10:-1 11:1 13:-1 14:-1 
-1 1:-1 2:-0.498647 3:-0.901786 5:0.230769 6:0.75 7:-0.997193 8:-1 9:1 10:-0.910448 11:-1 13:-1 14:-0.99934 
-1 1:1 2:-0.528722 3:-0.910714 5:0.230769 6:-0.25 7:-0.877193 8:-1 9:-1 10:-1 11:-1 13:-0.8 14:-1 
+1 1:1 2:-0.56391 3:-0.64 4:-1 5:0.0769231 7:-0.894737 8:1 9:1 10:-0.761194 11:1 13:-0.856 14:-0.99986 
+1 1:1 2:-0.203008 3:0.535714 5:0.384615 6:1 7:0.403509 8:1 9:1 10:-0.671642 11:-1 13:-1 14:-0.976 
-1 1:1 2:-0.315789 3:-0.696429 5:0.538462 6:-0.25 7:-0.754386 8:-1 9:-1 10:-1 11:-1 13:-0.546 14:-0.999 
-1 1:1 2:-0.644211 3:-0.976071 5:-0.538462 6:0.75 7:-0.754386 8:-1 9:-1 10:-1 11:1 13:-0.66 14:-1 
-1 1:1 2:-0.516391 3:-0.75 5:0.0769231 6:-0.25 7:-0.988421 8:-1 9:-1 10:-1 11:-1 13:-0.784 14:-1 
-1 1:1 2:-0.719398 3:-1 5:-0.538462 6:-0.25 7:-0.929825 8:-1 9:1 10:-0.671642 11:-1 12:-1 13:-1 14:-1 
+1 1:-1 2:-0.446015 3:-0.895714 5:0.230769 6:-0.25 7:-0.92386 8:1 9:1 10:-0.522388 11:-1 13:-0.88 14:-0.95842 
+1 1:1 2:-0.656541 3:-0.75 5:0.846154 6:-0.25 7:-0.95614 8:1 9:1 10:-0.791045 11:-1 13:-1 14:-0.85882 
-1 1:-1 2:-0.35579 3:-0.732143 5:-1 6:-1 7:-1 8:-1 9:1 10:-0.820896 11:-1 13:-1 14:-0.996 
-1 1:-1 2:-0.854737 3:-0.285714 5:-0.846154 6:-0.25 7:-0.970877 8:-1 9:-1 10:-1 11:-1 13:-0.92 14:-0.99916 
-1 1:1 2:-0.212932 3:-0.642857 5:-0.692308 7:-0.985263 8:-1 9:-1 10:-1 11:-1 13:-0.45 14:-1 
-1 1:1 2:-0.709173 3:-0.928571 5:0.0769231 6:-0.25 7:-0.964912 8:-1 9:-1 10:-1 11:1 12:-1 13:-0.72 14:-1 
+1 1:1 2:-0.283308 3:-1 5:0.0769231 6:-0.25 7:-1 8:-1 9:-1 10:-1 11:-1 12:1 13:-0.816 14:-1 
-1 1:-1 2:-0.669173 3:-0.0239286 5:0.538462 6:0.75 7:-0.894737 8:-1 9:-1 10:-1 11:-1 13:-0.72 14:-0.99998 
+1 1:-1 3:-0.0714286 5:-0.692308 7:-0.637544 8:1 9:1 10:-0.731343 11:1 13:-1 14:-1 
+1 1:1 2:-0.385865 3:-0.625 5:0.230769 6:-0.25 7:-0.994035 8:-1 9:-1 10:-1 11:1 13:-0.71 14:-0.99988 
-1 1:1 2:-0.746767 3:-0.958214 4:-1 5:-1 6:-1 7:-1 8:-1 9:-1 10:-1 11:-1 13:-0.9 14:-1 
-1 1:1 2:-0.578947 3:-0.907857 5:-0.538462 6:0.75 7:-0.982456 8:-1 9:-1 10:-1 11:1 12:-1 13:-0.86 14:-1 
-1 1:1 2:-0.12782 3:-0.708214 5:-0.230769 6:-0.25 7:-0.997193 8:-1 9:-1 10:-1 11:-1 13:-0.892 14:-0.998 
-1 1:1 2:-0.551278 3:0.0357143 5:-0.846154 6:-0.25 7:-0.991228 8:-1 9:-1 10:-1 11:-1 13:-1 14:-0.99428 
+1 1:1 2:-0.323308 3:-0.642857 5:0.0769231 7:-0.824561 8:1 9:1 10:-0.820896 11:-1 13:-1 14:-0.99266 
-1 1:-1 2:-0.867068 3:-0.285714 4:-1 5:0.538462 6:0.75 7:-0.988421 8:-1 9:-1 10:-1 11:-1 13:-0.66 14:-1 
+1 1:1 2:-0.774436 3:-0.892857 5:0.230769 6:-0.25 7:-0.894737 8:-1 9:-1 10:-1 11:-1 13:-0.85 14:-0.99984 
-1 1:-1 2:-0.243008 3:-0.881071 5:-0.230769 6:-0.25 7:-0.982456 8:-1 9:-1 10:-1 11:-1 13:-1 14:-0.9922 
-1 1:1 2:-0.456241 3:-0.997143 4:-1 5:-0.0769231 6:-0.25 7:-0.997193 8:-1 9:-1 10:-1 11:-1 13:-1 14:-1 
-1 1:-1 2:-0.892331 3:-0.321429 5:-0.230769 6:-0.25 7:-0.877193 8:-1 9:1 10:-0.701493 11:1 13:-1 14:-0.9998 
+1 1:-1 2:-0.799398 3:-0.940357 5:0.538462 6:-0.25 7:-0.888772 8:1 9:1 10:-0.970149 11:-1 13:-1 14:-1 
-1 1:-1 2:-0.238195 3:-0.714286 5:0.0769231 6:-0.25 7:-0.789474 8:-1 9:-1 10:-1 11:-1 13:-0.52 14:-1 
+1 1:1 2:-0.250526 3:-0.985 5:-0.538462 6:-0.25 7:-0.994035 8:1 9:-1 10:-1 11:1 13:-0.72 14:-1 
+1 1:1 2:-0.581353 3:-0.0178571 5:0.230769 6:-0.25 7:-0.596491 8:1 9:-1 10:-1 11:1 13:-0.513 14:-0.99 
+1 1:1 2:-0.578947 3:-0.958214 4:-1 5:0.846154 6:-0.25 7:-0.982456 8:1 9:1 10:-0.940299 11:-1 13:-0.74 14:-0.99 
-1 1:1 2:-0.842105 3:-1 4:-1 5:-1 6:-1 7:-1 8:-1 9:1 10:-0.880597 11:-1 13:-0.955 14:-0.99998 
+1 1:-1 2:-0.661654 3:-0.9375 5:1 6:0.75 7:-0.927018 8:1 9:-1 10:-1 11:1 13:-0.84 14:-0.8828 
+1 1:1 2:-0.581353 3:-0.857143 5:1 6:0.75 7:-0.929825 8:1 9:1 10:-0.880597 11:-1 13:-0.86 14:-0.84912 
-1 1:1 2:-0.744361 3:-0.357143 5:-0.230769 6:-0.25 7:-0.994035 8:-1 9:-1 10:-1 11:-1 13:-1 14:-1 
+1 1:-1 2:0.0851128 3:-0.0296429 5:-0.538462 6:0.75 7:-0.403509 8:1 9:-1 10:-1 11:1 13:-1 14:-1 
-1 1:1 2:-0.441203 3:-0.821429 5:0.0769231 6:-0.25 7:-0.912281 8:-1 9:-1 10:-1 11:1 13:-0.72 14:-1 
-1 1:1 2:-0.263158 3:-0.276786 4:-1 5:-0.538462 6:-0.25 7:-0.991228 8:-1 9:-1 10:-1 11:-1 13:-0.84 14:-1 
-1 1:1 2:0.00992487 3:-0.535714 5:0.0769231 6:-0.25 7:-0.929825 8:-1 9:-1 10:-1 11:1 13:-1 14:-0.99544 
-1 1:1 2:-0.576541 3:-0.714286 4:-1 5:-0.692308 6:0.75 7:-0.596491 8:1 9:1 10:-0.940299 11:1 13:-0.925 14:-1 
+1 1:-1 2:-0.338346 3:-0.934643 5:-0.230769 6:-0.25 7:-0.947368 8:1 9:1 10:-0.880597 11:-1 13:-1 14:-0.96834 
-1 1:1 2:-0.403609 3:-0.982143 5:-0.692308 7:-0.719298 8:-1 9:-1 10:-1 11:1 12:-1 13:-0.58 14:-1 
+1 1:1 2:-0.388571 3:-0.994286 4:-1 5:-0.0769231 7:-0.997193 8:1 9:1 10:-0.970149 11:1 13:-0.72 14:-0.96 
+1 1:-1 2:-0.789474 3:-0.261786 5:0.846154 6:0.75 7:-0.976491 8:1 9:1 10:-0.970149 11:1 13:-0.92 14:-0.999 
+1 1:1 2:-0.41594 3:-0.928571 5:1 6:-0.25 7:-0.947368 8:1 9:1 10:-0.791045 11:1 13:-0.66 14:-0.91858 
+1 1:1 2:-0.729323 3:-0.214286 5:0.538462 6:-0.25 7:-0.824561 8:1 9:1 10:-0.791045 11:1 13:-0.9 14:-0.98382 
+1 1:1 2:0.0526316 3:-0.392857 5:0.0769231 6:0.75 7:-0.122807 8:1 9:1 10:-0.731343 11:-1 13:-0.819 14:-0.9669 
+1 1:1 2:-0.193083 3:-0.642857 5:0.0769231 6:-0.25 7:-0.649123 8:1 9:1 10:-0.791045 11:-1 13:-1 14:-0.9387 
-1 1:1 2:-0.79188 3:-0.940357 4:-1 5:0.0769231 6:-0.25 7:-0.859649 8:-1 9:-1 10:-1 11:1 12:-1 13:-0.76 14:-1 
-1 1:-1 2:-0.24812 3:-0.892857 5:-1 6:-1 7:-1 8:-1 9:-1 10:-1 11:-1 13:-0.924 14:-1 
+1 1:-1 2:0.303158 3:0.392857 5:0.0769231 6:-0.25 7:-0.614035 8:1 9:1 10:-0.791045 11:-1 13:-1 14:-0.94 
+1 1:-1 2:-0.473684 3:-0.732143 5:0.846154 6:0.75 7:-0.95614 8:1 9:1 10:-0.731343 11:1 13:-0.819 14:-1 
-1 1:1 2:-0.75188 3:-0.943571 5:0.230769 6:-0.25 7:-0.979649 8:-1 9:1 10:-0.970149 11:-1 13:-0.58 14:-0.99434 
+1 1:-1 2:0.340752 3:-0.285714 5:0.538462 6:-0.25 7:-0.719298 8:1 9:1 10:-0.58209 11:-1 13:-1 14:-0.96796 
-1 1:1 2:-0.543759 3:-0.973214 5:0.0769231 6:-0.25 7:-0.979649 8:-1 9:-1 10:-1 11:-1 13:-0.78 14:-0.9972 
+1 1:-1 2:-0.0300752 3:-0.714286 5:-0.384615 6:-0.5 7:-1 8:1 9:-1 10:-1 11:-1 13:-0.9 14:-0.9808 
+1 1:1 2:-0.781955 3:-0.785714 4:-1 5:-0.846154 6:-0.25 7:-0.92386 8:1 9:1 10:-0.761194 11:1 13:-0.84 14:-0.99998 
+1 1:-1 2:-0.669173 3:-0.107143 5:-0.230769 6:-0.25 7:-0.894737 8:1 9:1 10:-0.641791 11:1 13:-0.88 14:-0.98866 
-1 1:-1 2:-0.787068 3:-0.964286 4:-1 5:0.384615 6:-0.75 7:-0.929825 8:-1 9:-1 10:-1 11:-1 13:-0.74 14:-1 
-1 1:1 2:-0.674286 3:-0.0357143 4:-1 5:-1 6:-1 7:-1 8:-1 9:-1 10:-1 11:-1 13:-0.816 14:-1 
-1 1:-1 2:-0.616541 3:-0.806429 4:-1 5:0.0769231 6:-0.25 7:-0.994035 8:-1 9:-1 10:-1 11:-1 12:-1 13:-0.92 14:-1 
-1 1:1 2:-0.182857 3:-0.940357 5:-1 6:-1 7:-1 8:1 9:-1 10:-1 11:-1 13:-0.87 14:-0.99998 
-1 1:-1 2:-0.260752 3:-0.684643 5:0.0769231 6:-0.25 7:-0.991228 8:-1 9:-1 10:-1 11:-1 13:-0.84 14:-1 
-1 1:1 2:-0.824662 3:-0.958214 5:-1 6:-1 7:-1 8:-1 9:1 10:-0.910448 11:-1 13:-0.65 14:-0.98462 
+1 1:1 2:-0.233083 3:-0.321429 5:-0.0769231 6:-0.25 7:-0.54386 8:1 9:1 10:-0.58209 11:-1 13:-0.76 14:-0.90786 
+1 1:1 2:-0.639098 3:-0.964286 5:0.0769231 6:-0.25 7:-0.897544 8:1 9:1 10:-0.850746 11:1 13:-0.688 14:-1 
+1 1:-1 2:-0.0276691 3:-0.785714 5:0.0769231 6:-0.25 7:-0.833333 8:1 9:1 10:-0.761194 11:1 13:-0.604 14:-0.91682 
-1 1:1 2:-0.821955 3:-0.285714 4:-1 5:-0.538462 6:0.75 7:-0.941404 8:1 9:-1 10:-1 11:1 13:-0.86 14:-1 
-1 1:-1 2:-0.744361 3:-0.910714 4:-1 5:-1 6:-1 7:-0.77193 8:-1 9:-1 10:-1 11:-1 13:-0.72 14:-1 
-1 1:1 2:-0.847218 3:-0.747143 4:-1 5:-1 6:-1 7:-1 8:-1 9:-1 10:-1 11:1 13:-0.82 14:-0.99998 
+1 1:1 2:0.513684 3:0.428571 5:1 6:0.75 7:0.22807 8:1 9:1 10:-0.731343 11:1 13:-1 14:-0.98 
-1 1:-1 2:-0.917293 3:-0.910714 5:0.538462 6:-0.25 7:-0.982456 8:-1 9:1 10:-0.970149 11:-1 13:-0.892 14:-0.99804 
+1 1:-1 2:0.651729 3:0.0714286 5:0.384615 6:1 7:-1 8:1 9:1 10:-0.58209 11:-1 13:-1 14:-0.93248 
+1 1:1 2:0.894737 3:0.592143 5:0.384615 6:1 7:-0.105263 8:1 9:1 10:-0.970149 11:1 13:-1 14:-0.99782 
-1 1:-1 2:-0.934737 3:-0.794643 5:0.538462 6:-0.25 7:-0.994035 8:-1 9:-1 10:-1 11:-1 13:-0.88 14:-1 
-1 1:1 2:-0.366015 3:-0.714286 5:-0.846154 7:-0.122807 8:1 9:-1 10:-1 11:1 13:-0.816 14:-1 
+1 1:-1 2:0.0126315 3:-0.428571 5:0.384615 7:-0.54386 8:1 9:1 10:-0.820896 11:-1 13:-0.625 14:0.022 
+1 1:1 2:-0.716692 3:-1 5:0.0769231 6:-0.25 7:-1 8:-1 9:-1 10:-1 11:-1 12:1 13:-0.816 14:-1 
-1 1:1 2:-0.0550377 3:-0.892857 5:0.0769231 6:-0.25 7:-0.824561 8:1 9:-1 10:-1 11:1 13:-0.86 14:-1 
-1 1:1 2:-0.957293 3:-0.5 5:0.384615 6:-0.25 7:-0.929825 8:-1 9:-1 10:-1 11:-1 13:-0.4 14:-1 
-1 1:1 2:-0.847218 3:-0.970357 4:-1 5:0.0769231 6:-0.25 7:-0.988421 8:-1 9:1 10:-0.970149 11:-1 13:-0.8 14:-0.99998 
+1 1:1 2:0.165414 3:-0.535714 5:-0.538462 6:-0.25 7:-0.558596 8:1 9:1 10:-0.552239 11:-1 13:-1 14:-0.77596 
+1 1:1 2:-0.836992 3:-1 4:-1 5:-0.0769231 7:-1 8:-1 9:-1 10:-1 11:1 12:-1 13:-0.5 14:-0.99998 
+1 1:1 2:-0.87218 3:-0.988214 5:0.538462 6:0.5 7:-0.985263 8:-1 9:-1 10:-1 11:-1 13:-0.8 14:-0.9992 
-1 1:1 2:-0.285714 3:-0.940357 5:0.384615 6:-0.25 7:-0.997193 8:-1 9:-1 10:-1 11:-1 13:-0.88 14:-0.9999 
+1 1:1 2:-0.731729 3:-0.886786 4:-1 5:0.230769 6:-0.25 7:-0.783509 8:1 9:1 10:-0.820896 11:-1 13:-0.92 14:-1 
-1 1:1 2:0.0249625 3:-0.7025 5:1 7:-0.994035 8:-1 9:-1 10:-1 11:1 13:-0.48 14:-1 
-1 1:1 2:-0.388571 3:-0.821429 5:0.0769231 6:-0.25 7:-0.929825 8:-1 9:-1 10:-1 11:-1 13:-0.54 14:-0.99968 
-1 1:-1 2:-0.418647 3:-0.883929 5:-0.846154 6:-0.25 7:-0.962105 8:-1 9:-1 10:-1 11:1 13:-1 14:-1 
+1 1:1 2:-0.117895 3:-0.973214 4:-1 5:0.0769231 6:-0.25 7:-0.973684 8:1 9:1 10:-0.761194 11:1 13:-0.7 14:-0.99676 
+1 1:1 2:-0.37594 3:-0.711429 4:-1 5:-0.692308 7:-0.403509 8:1 9:1 10:-0.791045 11:1 13:-0.805 14:-1 
-1 1:1 2:-0.12782 3:-0.785714 5:-0.692308 7:-0.929825 8:1 9:-1 10:-1 11:-1 13:-1 14:-0.996 
-1 1:1 2:-0.864662 3:-0.988214 5:-0.846154 6:-0.25 7:-0.982456 8:-1 9:-1 10:-1 11:1 12:-1 13:-0.72 14:-1 
-1 1:1 2:-0.719398 3:-0.821429 5:-1 6:-1 7:-0.994035 8:-1 9:-1 10:-1 11:1 13:-0.9 14:-0.91584 
+1 1:-1 2:-0.736842 3:-0.395714 4:-1 5:1 6:-0.25 7:-0.827368 8:-1 9:-1 10:-1 11:-1 13:-0.836 14:-1 
-1 1:1 2:-0.874586 3:-0.985357 5:-0.230769 6:-0.25 7:-0.997193 8:-1 9:-1 10:-1 11:-1 13:-0.72 14:-0.985 
-1 1:1 2:-0.859549 3:-0.256071 4:-1 5:-0.230769 6:-0.25 7:-0.991228 8:1 9:-1 10:-1 11:-1 13:-0.88 14:-0.9925 
-1 1:-1 2:-0.581353 3:-0.892857 5:-0.0769231 6:-0.25 7:-0.859649 8:1 9:-1 10:-1 11:-1 12:-1 13:-0.632 14:-1 
+1 1:-1 2:-0.844511 3:-0.339286 4:-1 5:0.0769231 6:-0.25 7:-0.929825 8:1 9:1 10:-0.880597 11:1 13:-0.92 14:-0.99 
-1 1:1 2:-0.731729 3:-0.946429 5:-0.692308 6:-0.25 7:-0.888772 8:-1 9:1 10:-0.970149 11:1 13:-0.6 14:-0.99982 
-1 1:1 2:0.466165 3:-0.0892857 4:-1 5:0.0769231 6:0.75 7:-0.649123 8:1 9:-1 10:-1 11:-1 13:-0.888 14:-1 
+1 1:-1 2:-0.706767 3:-0.357143 5:0.538462 6:-0.25 7:-0.403509 8:1 9:1 10:-0.850746 11:1 13:-0.88 14:-1 
-1 1:1 2:-0.353383 3:-0.773929 5:1 6:0.75 7:-0.736842 8:1 9:-1 10:-1 11:1 13:-0.32 14:-1 
-1 1:-1 2:0.295639 3:-0.696429 4:-1 5:-1 6:-1 7:-0.649123 8:-1 9:-1 10:-1 11:1 13:-1 14:-0.99992 
-1 1:-1 2:0.190376 3:-0.988214 5:-1 6:-1 7:-1 8:-1 9:-1 10:-1 11:1 12:-1 13:-0.938 14:-0.99946 
+1 1:1 2:-0.175338 3:-0.711429 5:0.846154 6:0.75 7:-0.508772 8:1 9:1 10:-0.761194 11:-1 13:-0.68 14:-1 
+1 1:1 2:-0.145263 3:-0.64 5:0.538462 6:0.75 7:-0.105263 8:1 9:-1 10:-1 11:1 13:-0.908 14:-1 
-1 1:1 2:-0.175338 3:-0.910714 4:-1 5:0.230769 6:-0.25 7:-0.982456 8:-1 9:-1 10:-1 11:-1 13:-1 14:-0.9961 
-1 1:-1 2:-0.398496 3:-0.946429 5:-0.538462 7:-0.929825 8:1 9:1 10:-0.910448 11:1 13:-0.788 14:-1 
+1 1:1 2:-0.641504 3:-0.107143 5:0.846154 6:-0.25 7:-0.915088 8:1 9:1 10:1 11:1 13:-0.86 14:-0.99484 
+1 1:1 2:-0.681805 3:-0.526786 4:-1 5:-0.846154 6:-0.25 7:-0.614035 8:1 9:-1 10:-1 11:1 12:-1 13:-0.9 14:-1 
+1 1:1 2:-0.71188 3:-0.169643 4:-1 5:0.230769 6:-0.25 7:-0.941404 8:1 9:-1 10:-1 11:1 13:-0.84 14:-0.994 
-1 1:1 2:-0.491128 3:-0.821429 5:0.846154 6:0.75 7:-0.842105 8:-1 9:-1 10:-1 11:1 12:-1 13:-0.66 14:-1 
-1 1:1 2:-0.295639 3:-0.714286 5:0.0769231 7:-0.649123 8:1 9:-1 10:-1 11:1 12:-1 13:-0.72 14:-1 
-1 1:1 2:-0.62406 3:-0.89 5:0.230769 6:-0.25 7:-0.991228 8:-1 9:-1 10:-1 11:-1 13:-0.9 14:-1 
-1 1:-1 2:-0.518797 3:-0.9525 5:0.230769 6:-0.25 7:-0.982456 8:-1 9:-1 10:-1 11:1 13:-0.7 14:-1 
-1 1:-1 2:-0.721805 3:-0.868929 5:-0.384615 6:-0.5 7:-1 8:-1 9:1 10:-0.970149 11:-1 13:-0.8 14:-0.99894 
-1 1:1 2:-0.894737 3:-0.785714 5:-0.538462 6:-0.25 7:-0.997193 8:-1 9:-1 10:-1 11:1 13:-0.84 14:-0.9992 
+1 1:1 2:-0.533835 3:0.0564286 5:-0.230769 6:-0.25 7:-0.646316 8:1 9:1 10:-0.850746 11:1 13:-0.832 14:-1 
-1 1:-1 2:-0.553985 3:-0.747143 5:-0.692308 7:-0.964912 8:1 9:-1 10:-1 11:1 13:-0.829 14:-1 
-1 1:1 2:-0.373534 3:-1 5:0.0769231 6:-0.25 7:-1 8:-1 9:-1 10:-1 11:-1 12:1 13:-0.816 14:-1 
-1 1:1 2:-0.709173 3:-0.958214 5:0.0769231 6:0.75 7:-0.994035 8:1 9:-1 10:-1 11:-1 13:-0.82 14:-1 
+1 1:1 2:-0.661654 3:-0.196429 5:0.0769231 6:-0.25 7:-0.824561 8:1 9:1 10:-0.492537 11:-1 13:-0.8 14:-0.97584 
+1 1:-1 2:-0.849624 3:-0.464286 5:0.538462 6:-0.25 7:-0.809825 8:1 9:1 10:-0.850746 11:-1 13:-0.816 14:-0.46548 
-1 1:1 2:-0.89985 3:-0.982143 5:0.538462 6:-0.25 7:-0.976491 8:-1 9:1 10:-0.880597 11:-1 13:-0.84 14:-0.99984 
-1 1:-1 2:-0.929925 3:-0.976071 5:-1 6:-1 7:-1 8:-1 9:1 10:-0.970149 11:-1 13:-0.84 14:-0.99748 
-1 1:1 2:-0.423459 3:-0.821429 5:-0.230769 6:-0.25 7:-0.877193 8:-1 9:1 10:-0.940299 11:1 13:-0.28 14:-1 
+1 1:-1 2:-0.802105 3:-0.285714 5:0.0769231 6:0.75 7:-0.929825 8:1 9:1 10:-0.880597 11:-1 13:-0.95 14:-0.9707 
-1 1:-1 2:-0.759398 3:-0.875 4:-1 5:-0.384615 6:-0.5 7:-1 8:-1 9:-1 10:-1 11:-1 13:-0.84 14:-1 
+1 1:1 2:-0.41594 3:-0.925714 5:0.692308 6:0.75 7:-0.54386 8:1 9:-1 10:-1 11:1 13:-0.836 14:-0.3743 
-1 1:-1 2:-0.651729 3:-0.851071 5:0.0769231 6:0.75 7:-0.807018 8:1 9:-1 10:-1 11:1 13:-0.64 14:-0.99998 
+1 1:-1 2:-0.669173 3:-0.785714 5:0.538462 6:0.75 7:-0.871228 8:1 9:1 10:-0.432836 11:-1 13:-1 14:-0.99 
+1 1:1 2:-0.486316 3:-1 5:0.230769 6:-0.25 7:-0.912281 8:1 9:1 10:-0.970149 11:-1 13:-0.798 14:-1 
-1 1:1 2:-0.789474 3:-0.636786 4:-1 5:-0.384615 6:-0.25 7:-0.979649 8:-1 9:-1 10:-1 11:-1 13:-0.86 14:-0.99632 
-1 1:-1 2:-0.200601 3:-0.419643 4:-1 5:-0.538462 6:-0.25 7:-0.988421 8:-1 9:1 10:-0.940299 11:-1 13:-0.816 14:-0.99964 
-1 1:1 2:-0.528722 3:-0.910714 5:0.0769231 6:0.75 7:-0.982456 8:-1 9:1 10:-0.940299 11:1 13:-0.6 14:-0.99784 
-1 1:1 2:-0.182857 3:-0.964286 4:-1 5:-0.0769231 6:-0.25 7:-0.964912 8:-1 9:-1 10:-1 11:1 13:-0.87 14:-1 
+1 1:-1 2:-0.526316 3:-0.967143 5:-0.538462 6:-0.25 7:-0.962105 8:1 9:1 10:-0.880597 11:-1 13:-0.62 14:-0.99 
+1 1:1 2:0.223158 3:-0.964286 4:-1 5:-0.538462 6:0.75 7:-0.722105 8:1 9:-1 10:-1 11:-1 13:-0.82 14:-0.99372 
-1 1:1 2:-0.390977 3:-0.607143 4:-1 5:0.0769231 6:-0.25 7:-0.894737 8:-1 9:-1 10:-1 11:1 13:-0.94 14:-1 
-1 1:1 2:-0.661654 3:-0.142857 5:-0.538462 6:-0.25 7:-0.842105 8:1 9:1 10:-0.940299 11:1 13:-0.88 14:-0.9999 
-1 1:-1 2:-0.614135 3:-0.818571 4:-1 5:-1 6:-1 7:-1 8:-1 9:-1 10:-1 11:1 13:-0.82 14:-0.9988 
+1 1:-1 2:-0.418647 3:-0.669643 5:0.538462 6:0.75 7:-0.885965 8:1 9:1 10:-0.940299 11:-1 13:-1 14:-1 
-1 1:1 2:-0.400902 3:-0.845357 5:0.0769231 6:-0.25 7:-0.894737 8:-1 9:-1 10:-1 11:-1 12:1 13:-0.88 14:-1 
-1 1:1 2:-0.325714 3:-0.607143 5:-0.692308 7:-0.649123 8:-1 9:-1 10:-1 11:-1 13:-0.79 14:-0.98626 
-1 1:1 2:-0.827068 3:-0.979286 5:-0.538462 6:-0.25 7:-0.979649 8:-1 9:-1 10:-1 11:-1 13:-0.72 14:-0.99272 
+1 1:1 2:-0.686617 3:-0.9375 5:0.538462 6:-0.25 7:-0.675439 8:1 9:1 10:-0.940299 11:1 13:-0.48 14:-0.96 
+1 1:-1 2:-0.496241 3:-0.535714 5:0.0769231 7:-0.719298 8:1 9:1 10:-0.791045 11:1 13:-1 14:-0.9387 
-1 1:1 2:-0.81203 3:-0.5 5:0.0769231 6:-0.25 7:-0.964912 8:-1 9:-1 10:-1 11:-1 13:-1 14:-1 
+1 1:1 2:-0.651729 3:-0.958571 5:0.0769231 6:-0.25 7:-0.979649 8:1 9:1 10:-0.791045 11:1 13:-0.904 14:-0.89752 
-1 1:1 2:-0.52391 3:-0.660714 5:-0.0769231 6:-0.25 7:-0.859649 8:-1 9:1 10:-0.970149 11:1 13:-0.54 14:-0.99864 
-1 1:1 2:-0.115188 3:-0.839286 5:-0.692308 7:-0.947368 8:1 9:-1 10:-1 11:-1 13:-0.44 14:-1 
-1 1:1 2:-0.548872 3:-0.916786 5:-0.538462 6:-0.25 7:-0.964912 8:1 9:-1 10:-1 11:-1 12:-1 13:-0.72 14:-1 
-1 1:1 2:-0.46406 3:-0.785714 4:-1 5:-0.692308 7:-0.508772 8:-1 9:-1 10:-1 11:-1 13:-1 14:-0.99998 
+1 1:1 2:-0.804511 3:-0.288571 5:0.384615 6:-0.75 7:-1 8:1 9:-1 10:-1 11:-1 13:-1 14:-1 
+1 1:1 2:-0.0601504 3:-0.392857 5:0.846154 6:0.75 7:-0.0175439 8:1 9:1 10:-0.970149 11:1 13:-0.912 14:-0.96 
+1 1:-1 2:-0.726917 3:-0.836429 5:0.538462 6:0.75 7:-0.839298 8:1 9:1 10:-0.791045 11:1 13:-0.86 14:-0.95232 
+1 1:-1 2:-0.79188 3:-0.785714 5:0.538462 6:-0.25 7:-0.988421 8:1 9:1 10:-0.910448 11:-1 13:-0.9 14:-0.99988 
-1 1:1 2:-0.576541 3:-0.892857 5:0.230769 6:-0.25 7:-0.842105 8:-1 9:1 10:-0.970149 11:1 13:-0.9 14:-0.99994 
-1 1:1 2:-0.182857 3:-0.839286 4:-1 5:1 6:0.75 7:-0.298246 8:1 9:-1 10:-1 11:1 13:-0.824 14:-1 
+1 1:1 2:0.283308 3:1 4:-1 5:0.0769231 6:-0.25 7:1 8:1 9:1 10:0.19403 11:-1 13:-1 14:-0.9997 
+1 1:-1 2:0.513684 3:-0.988214 5:-1 6:-1 7:-1 8:1 9:1 10:-0.970149 11:-1 13:-0.768 14:-0.998 
+1 1:-1 2:-0.739248 3:-0.196429 4:-1 5:1 6:0.75 7:-0.947368 8:1 9:1 10:-0.880597 11:-1 13:-1 14:-0.99358 
-1 1:-1 2:-0.681805 3:-0.821429 4:-1 5:-0.692308 7:-0.684211 8:-1 9:-1 10:-1 11:-1 13:-0.8 14:-0.99088 
-1 1:-1 2:0.676692 3:-0.571429 5:-1 6:-1 7:-1 8:-1 9:-1 10:-1 11:-1 12:-1 13:-1 14:-1 
-1 1:1 2:-0.343459 3:-0.946429 5:-0.538462 6:-0.25 7:-0.894737 8:-1 9:-1 10:-1 11:1 13:-0.769 14:-1 
+1 1:1 2:0.0400001 3:-0.142857 5:-0.0769231 6:-0.25 7:0.122807 8:1 9:-1 10:-1 11:-1 12:-1 13:-0.89 14:-1 
+1 1:-1 2:-0.569023 3:0.0714286 4:-1 5:0.384615 6:1 7:-1 8:1 9:-1 10:-1 11:-1 13:-1 14:-0.73576 
+1 1:1 2:-0.35579 3:-0.821429 5:-0.538462 6:-0.25 7:-0.684211 8:1 9:1 10:-0.791045 11:-1 13:-0.85 14:-0.9746 
+1 1:1 2:0.075188 3:-0.458214 5:-0.692308 7:-0.467719 8:1 9:1 10:-0.552239 11:1 13:-1 14:-0.9 
-1 1:1 2:1 3:-0.607143 5:0.0769231 6:-0.25 7:-0.962105 8:1 9:-1 10:-1 11:-1 13:-1 14:-0.9932 
-1 1:1 2:-0.533835 3:-0.0714286 5:-0.846154 6:0.75 7:-0.964912 8:-1 9:-1 10:-1 11:-1 13:-0.772 14:-1 
-1 1:-1 2:-0.904662 3:-0.964286 5:-0.692308 6:-0.25 7:-0.988421 8:-1 9:1 10:-0.820896 11:1 13:-0.76 14:-0.9993 
-1 1:-1 2:-0.932331 3:-0.988214 5:-0.230769 6:-0.25 7:-0.929825 8:-1 9:1 10:-0.940299 11:1 13:-0.68 14:-0.99998 
+1 1:1 2:0.393384 3:0.0357143 5:-1 6:-1 7:0.263158 8:1 9:1 10:-0.552239 11:1 13:-1 14:-0.98 
+1 1:1 2:-0.571429 3:-0.857143 5:-0.538462 6:0.75 7:-0.707719 8:1 9:1 10:-0.940299 11:1 13:-0.819 14:-1 
+1 1:1 2:-0.165414 3:-0.89 5:-0.692308 7:-0.754386 8:-1 9:-1 10:-1 11:-1 13:-0.784 14:-1 
-1 1:1 2:-0.689323 3:-0.357143 5:-0.230769 6:-0.25 7:-0.982456 8:-1 9:-1 10:-1 11:1 13:-1 14:-1 
-1 1:1 2:-0.676692 3:-0.0475 4:-1 5:-0.230769 6:-0.25 7:-0.997193 8:-1 9:-1 10:-1 11:1 13:-0.88 14:-0.9905 
+1 1:1 2:-0.368421 3:0.0714286 5:0.692308 6:0.5 7:-0.622807 8:1 9:1 10:-0.731343 11:1 13:-1 14:-0.99732 
-1 1:1 2:-0.400902 3:-0.910714 5:0.230769 6:-0.25 7:-0.918246 8:-1 9:-1 10:-1 11:-1 13:-0.88 14:-1 
+1 1:-1 2:-0.185564 3:-0.285714 5:0.538462 6:0.75 7:-0.877193 8:1 9:-1 10:-1 11:-1 13:-0.971 14:-0.98326 
+1 1:1 2:-0.799398 3:-0.868929 5:0.0769231 6:-0.25 7:-0.842105 8:1 9:1 10:-0.970149 11:-1 13:-0.9 14:-0.997 
+1 1:1 2:-0.285714 3:-0.919643 4:-1 5:-0.846154 6:-0.25 7:-0.894737 8:-1 9:-1 10:-1 11:1 13:-0.569 14:-1 
+1 1:1 2:0.0451128 3:-0.696429 5:-0.0769231 6:-0.25 7:-0.991228 8:1 9:-1 10:-1 11:1 13:-0.775 14:-1 
-1 1:1 2:-0.721805 3:-0.946429 5:-0.0769231 6:-0.25 7:-0.964912 8:-1 9:-1 10:-1 11:1 12:-1 13:-0.68 14:-1 
-1 1:1 2:-0.360902 3:-0.758929 5:0.0769231 6:0.75 7:-0.418246 8:-1 9:-1 10:-1 11:1 13:-1 14:-1 
-1 1:1 2:-0.922406 3:-0.803571 5:-0.230769 6:-0.25 7:-0.953333 8:-1 9:1 10:-0.970149 11:-1 13:-0.92 14:-0.99958 
+1 1:1 2:-0.731729 3:-0.25 5:0.538462 6:0.75 7:-0.906316 8:1 9:-1 10:-1 11:-1 13:-0.9 14:-1 
-1 1:-1 2:-0.759398 3:-0.160714 5:0.0769231 6:-0.25 7:-0.982456 8:-1 9:-1 10:-1 11:1 13:-0.82 14:-1 
+1 1:-1 2:-0.659248 3:-0.818571 4:-1 5:-0.230769 6:-0.25 7:-0.982456 8:1 9:-1 10:-1 11:1 13:-0.63 14:-1 
+1 1:1 2:-0.320902 3:-0.848214 4:-1 5:0.230769 6:-0.25 7:-0.994035 8:1 9:1 10:-0.970149 11:-1 13:-0.95 14:-0.97626 
-1 1:-1 2:-0.553985 3:-0.732143 5:0.0769231 6:-0.25 7:-0.982456 8:-1 9:1 10:-0.970149 11:1 13:-0.96 14:-0.99692 
-1 1:1 2:-0.746767 3:-0.133929 5:0.0769231 6:-0.25 7:-0.765965 8:-1 9:1 10:-0.940299 11:1 13:-0.82 14:-0.99654 
+1 1:1 2:-0.385865 3:-0.89 5:0.846154 6:-0.25 7:-0.89193 8:1 9:1 10:-0.970149 11:1 13:-0.48 
-1 1:1 2:-0.360902 3:-0.821429 5:-0.692308 6:-0.25 7:-0.929825 8:-1 9:-1 10:-1 11:1 13:-0.79 14:-1 
-1 1:1 2:-0.553985 3:-0.741071 5:-0.230769 6:-0.25 7:-0.982456 8:-1 9:-1 10:-1 11:1 13:-0.9 14:-1 
-1 1:-1 2:-0.836992 3:-0.613214 5:-0.692308 6:0.75 7:-0.979649 8:-1 9:-1 10:-1 11:-1 13:-0.92 14:-0.99032 
+1 1:1 2:-0.714286 3:-0.928571 5:0.0769231 6:-0.25 7:-0.941404 8:1 9:-1 10:-1 11:-1 12:-1 13:-0.7 14:-1 
-1 1:1 2:-0.917293 3:-0.991071 5:0.0769231 6:-0.25 7:-0.988421 8:-1 9:-1 10:-1 11:-1 13:-0.868 14:-1 
+1 1:-1 2:-0.809624 3:-0.991071 5:0.538462 6:-0.25 7:-0.929825 8:-1 9:1 10:-0.970149 11:-1 13:-0.76 14:-0.98464 
+1 1:1 2:-0.741955 3:-0.214286 5:0.230769 6:-0.25 7:-0.859649 8:1 9:1 10:-0.970149 11:-1 13:-0.92 14:-0.99444 
-1 1:1 2:-0.390977 3:-0.636786 4:-1 5:-0.692308 7:-0.92386 8:-1 9:-1 10:-1 11:1 13:-0.52 14:-1 
-1 1:-1 2:0.303158 3:-0.976071 5:-0.692308 7:-0.929825 8:1 9:-1 10:-1 11:1 13:-0.748 14:-0.95606 
-1 1:1 2:-0.924812 3:-0.940357 5:-0.0769231 6:-0.25 7:-0.994035 8:1 9:-1 10:-1 11:-1 12:-1 13:-0.8 14:-1 
+1 1:1 2:-0.426165 3:-0.821429 5:0.846154 6:0.75 7:-0.807018 8:1 9:1 10:-0.820896 11:-1 13:-0.84 14:-0.95856 
+1 1:1 2:0.037594 3:0.791786 5:0.230769 6:-0.25 7:-0.877193 8:1 9:1 10:-0.910448 11:-1 13:-0.88 14:-0.99972 
-1 1:1 2:-0.385865 3:-0.803571 5:-0.692308 7:-0.824561 8:-1 9:-1 10:-1 11:1 13:-0.768 14:-0.996 
-1 1:1 2:-0.862256 3:-0.913571 4:-1 5:0.384615 6:-0.75 7:-1 8:-1 9:-1 10:-1 11:-1 13:-0.9 14:-1 
-1 1:1 2:-0.0827068 3:-0.964286 5:-0.0769231 6:-0.25 7:-0.245614 8:1 9:-1 10:-1 11:-1 12:-1 13:-0.6 14:-1 
-1 1:1 2:-0.243008 3:-0.875 5:-0.538462 6:-0.25 7:-0.964912 8:-1 9:-1 10:-1 11:1 13:-0.7 14:-0.99996 
-1 1:1 2:-0.463759 3:-0.946429 4:-1 5:-0.230769 6:-0.25 7:-0.754386 8:-1 9:-1 10:-1 11:1 13:-0.68 14:-1 
+1 1:1 2:-0.659248 3:-0.877857 5:1 6:-0.25 7:-0.883158 8:1 9:1 10:-0.970149 11:1 13:-0.605 14:-0.9996 
+1 1:1 2:0.553985 3:-0.214286 5:0.384615 6:1 7:0.403509 8:1 9:1 10:-0.791045 11:1 13:-0.978 14:-1 
+1 1:1 2:-0.170526 3:-1 5:0.0769231 7:0.0526316 8:1 9:-1 10:-1 11:-1 13:-1 14:-1 
-1 1:1 2:-0.473684 3:-0.919643 5:-1 6:-1 7:-1 8:-1 9:1 10:-0.970149 11:-1 13:-0.904 14:-0.99962 
-1 1:-1 2:-0.308271 3:-0.663571 5:-1 6:-1 7:-1 8:-1 9:-1 10:-1 11:-1 13:-0.84 14:-1 
-1 1:1 2:-0.441203 3:-0.464286 5:0.384615 7:-0.888772 8:1 9:-1 10:-1 11:1 12:-1 13:-0.58 14:-1 
-1 1:-1 2:-0.453534 3:-0.776786 5:-1 6:-1 7:-0.786667 8:-1 9:1 10:-0.940299 11:1 13:-0.8 14:-0.99992 
+1 1:1 2:-0.666767 3:-0.803571 5:0.0769231 6:-0.25 7:-0.842105 8:1 9:1 10:-0.820896 11:-1 13:-0.816 14:-0.988 
+1 1:1 2:-0.754286 3:-0.961429 4:-1 5:1 6:-0.25 7:-0.997193 8:1 9:1 10:-0.970149 11:1 13:-0.16 14:-0.99882 
+1 1:1 2:-0.383459 3:-0.785714 5:0.846154 6:0.75 7:-0.479649 8:1 9:-1 10:-1 11:1 13:-1 14:-1 
-1 1:1 2:0.145263 3:-0.785714 4:-1 5:-1 6:-1 7:-0.894737 8:-1 9:-1 10:-1 11:-1 13:-0.82 14:-0.99992 
-1 1:-1 2:-0.46406 3:-0.892857 5:-1 6:-1 7:-1 8:-1 9:1 10:-0.940299 11:1 13:-0.8 14:-0.9979 
-1 1:1 2:-0.258045 3:-0.949643 5:0.0769231 6:-0.25 7:-0.973684 8:-1 9:1 10:-0.940299 11:-1 13:-0.775 14:-0.99 
+1 1:1 2:-0.235489 3:-0.877857 5:1 6:-0.25 7:-0.991228 8:1 9:1 10:-0.850746 11:1 13:-0.52 14:-1 
-1 1:1 2:-0.867068 3:-0.824286 5:0.0769231 6:0.5 7:-0.932632 8:-1 9:1 10:-0.940299 11:1 13:-0.84 14:-0.98826 
+1 1:1 2:-0.240602 3:-0.642857 5:0.846154 6:-0.25 7:-0.754386 8:1 9:1 10:-0.701493 11:1 13:-1 14:-1 
-1 1:1 2:-0.81203 3:-0.211071 5:0.0769231 6:-0.25 7:-0.859649 8:-1 9:-1 10:-1 11:1 13:-0.864 14:-1 
-1 1:1 2:-0.428571 3:-0.833214 5:-0.846154 6:0.75 7:-0.596491 8:-1 9:-1 10:-1 11:1 13:-0.708 14:-1 
-1 1:1 2:-0.854737 3:-0.592143 5:-0.846154 6:-0.25 7:-0.962105 8:-1 9:-1 10:-1 11:-1 13:-0.88 14:-1 
-1 1:-1 2:-0.937444 3:-0.455357 5:0.538462 6:-0.25 7:-0.991228 8:-1 9:1 10:-0.970149 11:1 13:-1 14:-0.9968 
+1 1:1 2:-0.230677 3:-0.580357 5:0.846154 6:0.75 7:-0.298246 8:1 9:1 10:-0.58209 11:1 13:-0.601 14:-1 
-1 1:-1 2:-0.824662 3:-0.9525 5:0.230769 6:-0.25 7:-0.883158 8:-1 9:-1 10:-1 11:-1 13:-0.78 14:-0.9999 
+1 1:1 2:-0.77203 3:-0.25 5:0.0769231 6:-0.25 7:-0.789474 8:1 9:-1 10:-1 11:1 13:-1 14:-1 
-1 1:-1 2:-0.731729 3:-0.946429 5:0.0769231 6:-0.25 7:-0.859649 8:-1 9:1 10:-0.940299 11:1 13:-0.8 14:-0.99212 
-1 1:1 2:-0.641504 3:-0.767857 5:0.0769231 6:0.75 7:-0.839298 8:-1 9:1 10:-0.970149 11:1 13:-0.584 14:-0.99958 
-1 1:1 2:-0.779549 3:-0.279643 4:-1 5:0.384615 6:0.75 7:-0.912281 8:-1 9:-1 10:-1 11:-1 13:-0.74 14:-1 
-1 1:-1 2:0.0601504 3:-0.892857 5:-0.384615 6:-0.5 7:-1 8:1 9:-1 10:-1 11:1 13:-0.9 14:-0.99946 
-1 1:1 2:-0.79188 3:-0.622143 5:0.538462 6:-0.25 7:-0.973684 8:1 9:1 10:-0.970149 11:-1 13:-0.84 14:-1 
+1 1:-1 2:-0.821955 3:-0.985 5:0.538462 6:0.75 7:-0.979649 8:1 9:1 10:-0.671642 11:-1 13:-0.92 14:-0.99802 
+1 1:1 2:-0.756992 3:-0.982143 5:-0.846154 6:0.75 7:-0.953333 8:1 9:-1 10:-1 11:1 13:-1 14:-1 
-1 1:1 2:-0.606617 3:-0.961429 5:-0.538462 6:-1 7:-1 8:-1 9:-1 10:-1 11:-1 13:-0.9 14:-1 
-1 1:-1 2:-0.253233 3:-0.642857 5:0.846154 6:-0.25 7:-0.0526316 8:1 9:-1 10:-1 11:1 13:-0.02 14:-1 
+1 1:-1 2:0.0926316 3:-0.104286 5:-0.230769 6:-0.25 7:-0.839298 8:1 9:1 10:-0.910448 11:1 13:-0.844 14:-1 
-1 1:-1 2:-0.93985 3:-0.973214 5:0.0769231 6:-0.25 7:-0.929825 8:-1 9:-1 10:-1 11:-1 13:-0.88 14:-0.99964 
+1 1:-1 2:-0.676692 3:-0.0892857 5:0.0769231 7:-0.666667 8:1 9:1 10:-0.940299 11:-1 13:-0.927 14:-0.99112 
+1 1:1 2:-0.781955 3:-0.657857 4:-1 5:0.230769 6:-0.25 7:-0.842105 8:1 9:1 10:-0.970149 11:1 13:-0.92 14:-0.994 
+1 1:1 2:-0.749474 3:-0.214286 5:0.846154 6:-0.25 7:-0.953333 8:1 9:-1 10:-1 11:-1 13:-0.9 14:-1 
+1 1:1 2:0.22797 3:-0.3275 5:-1 6:-1 7:0.0115789 8:1 9:1 10:-0.671642 11:1 13:-0.97 14:-0.994 
+1 1:1 2:-0.869774 3:-0.607143 5:-0.538462 6:-0.25 7:-0.964912 8:1 9:-1 10:-1 11:-1 13:-0.92 14:-1 
+1 1:1 2:-0.310677 3:-0.684643 4:-1 5:-0.538462 6:-0.25 7:-0.982456 8:1 9:1 10:-0.701493 11:1 13:-0.68 14:-1 
+1 1:1 2:-0.265564 3:-0.276786 5:1 6:-0.25 7:-0.824561 8:1 9:1 10:-0.820896 11:-1 13:-0.48 14:-0.99608 
-1 1:1 2:-0.756992 3:-0.89 5:-0.538462 6:-0.25 7:-0.994035 8:-1 9:-1 10:-1 11:1 13:-0.644 14:-1 
-1 1:-1 2:0.14797 3:-0.535714 5:-0.692308 7:-0.783509 8:-1 9:-1 10:-1 11:1 13:-0.927 14:-1 
-1 1:1 2:-0.746767 3:-0.839286 5:-0.692308 6:-0.25 7:-0.991228 8:-1 9:-1 10:-1 11:-1 13:-0.84 14:-0.9998 
-1 1:1 2:0.163007 3:-0.892857 5:-0.846154 6:-0.25 7:-0.736842 8:-1 9:-1 10:-1 11:1 13:-1 14:-0.993 
+1 1:-1 2:0.418647 3:-0.642857 5:-0.230769 6:-0.25 7:-0.719298 8:1 9:1 10:-0.880597 11:-1 13:-1 14:-0.99802 
+1 1:1 2:-0.806917 3:-0.598214 5:0.230769 6:-0.25 7:-0.88 8:1 9:-1 10:-1 11:-1 12:-1 13:-0.88 14:-1 
+1 1:1 2:-0.714286 3:-0.714286 5:0.0769231 7:-0.982456 8:1 9:-1 10:-1 11:1 13:-0.84 14:-1 
-1 1:1 2:-0.325714 3:-0.97 4:-1 5:0.230769 6:-0.25 7:-0.979649 8:-1 9:-1 10:-1 11:1 13:-0.691 14:-0.99996 
-1 1:-1 2:-0.142857 3:-0.875 4:-1 5:0.0769231 6:-0.25 7:-1 8:-1 9:-1 10:-1 11:1 13:-0.85 14:-0.99998 
-1 1:1 2:-0.704361 3:-0.940357 5:-0.692308 6:0.75 7:-0.994035 8:-1 9:-1 10:-1 11:1 13:-0.78 14:-0.9999 
+1 1:-1 2:-0.330827 3:-0.928571 5:0.0769231 6:-0.25 7:-0.859649 8:1 9:1 10:-0.671642 11:-1 13:-1 14:-0.99088 
-1 1:1 2:-0.223158 3:-0.642857 5:-1 6:-1 7:-1 8:-1 9:1 10:-0.940299 11:-1 13:-0.983 14:-0.99998 
+1 1:-1 2:-0.847218 3:-0.684643 4:-1 5:0.0769231 6:0.75 7:-0.789474 8:1 9:-1 10:-1 11:-1 13:-0.76 14:-1 
-1 1:1 2:-0.593985 3:-0.955357 5:-0.230769 6:-0.25 7:-0.96807 8:1 9:-1 10:-1 11:1 13:-0.8 14:-1 
-1 1:1 2:-0.438496 3:-0.785714 5:-0.846154 6:-0.25 7:-0.988421 8:-1 9:-1 10:-1 11:1 13:-0.88 14:-1 
-1 1:1 2:-0.829474 3:-0.892857 4:-1 5:0.846154 6:-0.25 7:-0.859649 8:1 9:-1 10:-1 11:1 13:-0.9 14:-0.9996 
+1 1:-1 2:-0.734436 3:-0.232143 5:0.538462 6:-0.25 7:-0.970877 8:1 9:1 10:-0.850746 11:1 13:-1 14:-0.9888 
+1 1:1 2:-0.212932 3:-0.556429 5:0.538462 6:-0.25 7:-0.997193 8:1 9:1 10:-0.970149 11:-1 13:-0.8 14:-0.994 
+1 1:1 2:-0.731729 3:-0.988214 5:0.0769231 6:-0.5 7:-0.842105 8:-1 9:-1 10:-1 11:1 12:-1 13:-1 14:-1 
+1 1:-1 2:-0.709173 3:-0.943571 4:-1 5:0.538462 6:-0.25 7:-0.894737 8:1 9:1 10:-0.940299 11:1 13:-0.92 14:-0.992 
+1 1:-1 2:-0.511278 3:-0.622143 5:0.384615 6:-0.75 7:-0.842105 8:1 9:1 10:-0.850746 11:1 13:-0.901 14:-0.99 
+1 1:-1 2:-0.200601 3:-0.461429 4:-1 5:0.538462 6:0.75 7:-0.438596 8:1 9:1 10:-0.58209 11:-1 13:-1 14:-0.954 
+1 1:-1 2:-0.308271 3:-0.633929 5:0.384615 6:-0.25 7:-0.649123 8:1 9:-1 10:-1 11:1 13:-1 14:-0.92 
-1 1:1 2:-0.481203 3:-0.851071 5:0.0769231 6:-0.25 7:-0.994035 8:-1 9:-1 10:-1 11:-1 13:-0.7 14:-1 
+1 1:-1 2:-0.656541 3:-0.794643 5:1 6:0.75 7:-0.938596 8:1 9:-1 10:-1 11:-1 13:-0.64 14:-1 
-1 1:1 2:-0.588872 3:-0.107143 5:-0.230769 7:-0.982456 8:-1 9:-1 10:-1 11:1 13:-0.28 14:-1 
+1 1:1 2:-0.46406 3:-0.714286 5:1 6:-0.25 7:-0.649123 8:1 9:1 10:-0.910448 11:1 13:-0.71 14:-0.95442 
-1 1:1 2:-0.388571 3:-0.535714 5:-0.230769 6:-0.25 7:-0.991228 8:1 9:-1 10:-1 11:1 13:-0.557 14:-1 
-1 1:1 2:-0.749474 3:-0.833214 5:-0.538462 6:-0.25 7:-0.947368 8:-1 9:-1 10:-1 11:-1 13:-0.82 14:-1 
-1 1:1 2:-0.478797 3:-0.779643 5:0.0769231 6:-0.25 7:-0.824561 8:-1 9:1 10:-0.940299 11:1 13:-0.84 14:-0.99918 
-1 1:1 2:-0.46406 3:-0.964286 5:0.0769231 7:-0.941404 8:1 9:-1 10:-1 11:1 12:-1 13:-0.68 14:-1 
-1 1:1 2:-0.932331 3:-0.776786 5:0.230769 6:-0.25 7:-0.994035 8:-1 9:1 10:-0.970149 11:-1 13:-1 14:-0.99988 
+1 1:1 2:-0.593985 3:-0.881071 5:0.846154 6:0.75 7:-0.643158 8:1 9:1 10:-0.731343 11:-1 13:-0.601 14:-0.98346 
-1 1:1 2:-0.656541 3:-0.785714 5:0.0769231 6:-0.25 7:-0.912281 8:-1 9:1 10:-0.970149 11:-1 13:-1 14:-0.99956 
+1 1:1 2:0.62406 3:-0.607143 5:0.384615 6:1 7:-0.0877193 8:1 9:1 10:-0.970149 11:1 13:-1 14:-1 
+1 1:-1 2:-0.847218 3:-0.321429 5:0.230769 6:-0.25 7:-0.885965 8:1 9:1 10:-0.820896 11:1 13:-0.96 14:-0.988 
-1 1:-1 2:-0.593985 3:-0.979286 5:-0.0769231 6:0.75 7:-0.991228 8:-1 9:1 10:-0.970149 11:1 13:-0.728 14:-0.99784 
-1 1:-1 2:-0.824662 3:-0.9525 4:-1 5:0.0769231 6:-0.25 7:-0.929825 8:-1 9:1 10:-0.970149 11:-1 13:1 14:-0.99996 
-1 1:1 2:-0.488722 3:-0.886786 5:-0.846154 6:-0.25 7:-0.958947 8:-1 9:-1 10:-1 11:1 12:-1 13:-1 14:-1 
-1 1:-1 2:0.0977444 3:-0.940357 5:-0.230769 6:-0.25 7:-0.964912 8:-1 9:-1 10:-1 11:1 13:-0.76 14:-0.99766 
-1 1:1 2:-0.478797 3:-0.892857 4:-1 5:0.230769 6:-0.25 7:-0.997193 8:-1 9:-1 10:-1 11:-1 12:-1 13:-0.84 14:-1 
+1 1:1 2:0.137744 3:0.0714286 5:0.0769231 6:-0.25 7:-0.403509 8:1 9:1 10:-0.731343 11:-1 13:-1 14:-1 
-1 1:-1 2:-0.313383 3:-0.979286 5:-1 6:-1 7:-1 8:-1 9:1 10:-0.701493 11:-1 13:-0.8 14:-0.99964 
+1 1:1 2:-0.403609 3:-0.803571 5:-0.0769231 6:-0.25 7:-0.701754 8:1 9:1 10:-0.820896 11:-1 13:-0.796 14:-1 
+1 1:-1 2:-0.787068 3:-0.785714 5:-0.230769 6:-0.25 7:-0.997193 8:1 9:-1 10:-1 11:-1 13:-0.9 14:-1 
-1 1:1 2:-0.325714 3:0.294643 5:0.230769 6:-0.25 7:-0.994035 8:-1 9:-1 10:-1 11:-1 13:-0.68 14:-0.92896 
-1 1:1 2:0.112782 3:-0.958214 5:-1 6:-1 7:-1 8:-1 9:-1 10:-1 11:-1 13:-0.855 14:-1 
-1 1:-1 2:-0.704361 3:-0.940714 5:0.538462 6:-0.25 7:-0.970877 8:-1 9:1 10:-0.970149 11:1 13:-0.8 14:-0.99978 
+1 1:1 2:-0.35579 3:-0.678571 5:1 6:0.75 7:-0.596491 8:-1 9:-1 10:-1 11:1 12:-1 13:-0.289 14:-1 
+1 1:-1 2:0.343459 3:0.5 5:-0.692308 7:-0.298246 8:1 9:1 10:-0.61194 11:-1 13:-1 14:-0.866 
+1 1:1 2:-0.56391 3:-0.9375 5:-0.0769231 6:-0.25 7:-0.932632 8:1 9:1 10:-0.910448 11:1 13:-0.604 14:-1 
-1 1:1 2:-0.46406 3:-0.955357 5:-0.538462 6:-0.25 7:-0.982456 8:-1 9:-1 10:-1 11:-1 13:-0.62 14:-0.9598 
-1 1:-1 2:-0.458647 3:-0.785714 4:-1 5:-0.384615 6:-0.5 7:-1 8:-1 9:-1 10:-1 11:-1 13:-0.84 14:-0.9996 
+1 1:1 2:-0.829474 3:-0.535714 5:0.230769 6:0.75 7:-0.897544 8:1 9:1 10:-0.791045 11:-1 13:-0.92 14:-0.94092 
+1 1:1 2:-0.238195 3:-0.571429 5:-0.0769231 6:-0.25 7:-0.909474 8:1 9:1 10:-0.850746 11:1 13:-0.892 14:-0.97806 
-1 1:1 2:-0.89985 3:-0.765 5:-0.692308 6:-0.25 7:-0.976491 8:-1 9:-1 10:-1 11:1 13:-0.86 14:-0.99996 
-1 1:1 2:-0.0652631 3:-0.5 4:-1 5:0.0769231 6:-0.25 7:-0.885965 8:-1 9:-1 10:-1 11:-1 13:-0.84 14:-0.99996 
-1 1:1 2:-0.924812 3:-1 4:-1 5:-0.230769 6:-0.25 7:-0.982456 8:-1 9:-1 10:-1 11:-1 13:-0.94 14:-1 
+1 1:-1 2:-0.175338 3:-0.535714 5:0.538462 6:-0.25 7:-0.964912 8:1 9:1 10:-0.910448 11:1 13:-0.855 14:-1 
+1 1:1 2:-0.543759 3:0.0714286 5:0.0769231 6:0.75 7:-0.625614 8:1 9:1 10:-0.671642 11:-1 13:-1 14:-0.95434 
-1 1:-1 2:-0.626466 3:-0.857143 5:-0.384615 6:-0.5 7:-1 8:-1 9:-1 10:-1 11:1 13:-0.724 14:-0.99998 
+1 1:1 2:-0.253233 3:-0.761786 5:0.230769 6:-0.25 7:-0.719298 8:1 9:1 10:-0.58209 11:-1 13:-0.617 14:-0.97312 
+1 1:1 2:-0.656541 3:-0.571429 5:0.0769231 6:-0.25 7:-0.929825 8:1 9:1 10:-0.910448 11:-1 13:-1 14:-1 
+1 1:-1 2:-0.566316 3:-0.973214 5:0.538462 6:-0.25 7:-0.958947 8:1 9:1 10:-0.880597 11:-1 13:-0.92 14:-1 
+1 1:1 2:0.794586 3:0.267857 5:-1 6:-1 7:-1 8:1 9:-1 10:-1 11:1 13:-1 14:-1 
-1 1:1 2:-0.736842 3:-0.178571 4:-1 5:-0.0769231 6:-0.25 7:-0.894737 8:-1 9:-1 10:-1 11:1 13:-1 14:-0.92 
-1 1:-1 2:-0.596391 3:-0.910714 5:-1 6:-1 7:-1 8:-1 9:1 10:-0.970149 11:-1 13:-0.908 14:-0.994 
+1 1:-1 2:-0.836992 3:-0.386786 5:0.846154 6:0.75 7:-0.947368 8:1 9:1 10:-0.791045 11:-1 13:-0.904 14:-1 
+1 1:-1 2:-0.644211 3:-1 5:0.0769231 6:-0.25 7:-1 8:-1 9:-1 10:-1 11:-1 12:1 13:-0.816 14:-1 
-1 1:1 2:-0.46406 3:-0.997143 4:-1 5:-0.846154 6:-0.25 7:-0.701754 8:-1 9:-1 10:-1 11:1 13:-0.54 14:-1 
-1 1:-1 2:-0.736842 3:-0.392857 5:0.538462 6:-0.25 7:-0.877193 8:1 9:1 10:-0.701493 11:-1 13:-0.92 14:-0.9802 
-1 1:-1 2:-0.724211 3:-0.910714 5:0.538462 6:-0.25 7:-0.982456 8:-1 9:-1 10:-1 11:1 13:-0.88 14:-0.98382 
-1 1:1 2:-0.714286 3:-0.0982143 5:0.0769231 6:-0.25 7:-0.991228 8:-1 9:1 10:-0.940299 11:-1 13:-1 14:-0.88896 
-1 1:-1 2:-0.526316 3:-0.9225 4:-1 5:1 6:-0.25 7:-0.929825 8:-1 9:-1 10:-1 11:-1 13:-0.72 14:-0.99974 
-1 1:-1 2:-0.451128 3:-0.571429 5:-0.846154 6:-0.25 7:-0.912281 8:-1 9:-1 10:-1 11:-1 13:-0.728 14:-1 
+1 1:1 2:-0.601504 3:-0.892857 4:-1 5:0.230769 6:-0.25 7:-0.973684 8:1 9:-1 10:-1 11:1 13:-0.74 14:-0.9787 
-1 1:1 2:-0.83218 3:-0.220357 5:0.0769231 7:-0.958947 8:-1 9:1 10:-0.940299 11:1 13:-0.8 14:-0.99986 
-1 1:1 2:-0.338346 3:-0.8275 5:0.230769 6:-0.25 7:-0.991228 8:-1 9:1 10:-0.940299 11:-1 13:-0.78 14:-0.99998 
-1 1:1 2:-0.847218 3:-1 5:0.538462 6:-0.25 7:-0.953333 8:-1 9:-1 10:-1 11:-1 13:-0.84 14:-0.99998 
+1 1:-1 2:-0.548872 3:-0.732143 5:0.0769231 6:-0.25 7:-0.92386 8:1 9:1 10:-0.970149 11:1 13:-0.629 14:-1 
+1 1:1 2:-0.378346 3:-0.696429 5:-0.692308 7:-0.77193 8:1 9:1 10:-0.940299 11:-1 13:-0.726 14:-0.9878 
-1 1:-1 2:-0.413534 3:-0.785714 4:-1 5:-0.230769 6:-0.25 7:-0.859649 8:-1 9:-1 10:-1 11:-1 13:-0.82 14:-1 
+1 1:1 2:0.20812 3:-0.3125 5:0.384615 6:-0.25 7:-0.39193 8:1 9:1 10:-0.850746 11:-1 13:-1 14:-1 
-1 1:1 2:-0.654135 3:-0.928571 5:-0.230769 6:-0.25 7:-0.964912 8:-1 9:-1 10:-1 11:-1 13:-0.8 14:-1 
-1 1:1 2:-0.438496 3:-0.845357 4:-1 5:-0.538462 6:-1 7:-1 8:-1 9:-1 10:-1 11:-1 13:-0.88 14:-1 
-1 1:-1 2:-0.779549 3:-0.642857 4:-1 5:-1 6:-1 7:-1 8:-1 9:-1 10:-1 11:-1 13:-1 14:-1 
+1 1:-1 2:0.285714 3:0.142857 5:-0.384615 6:-1 7:-1 8:1 9:1 10:-0.552239 11:-1 13:-1 14:-0.99506 
+1 1:1 2:-0.443609 3:-0.988214 4:-1 5:0.0769231 6:0.75 7:-0.77193 8:1 9:1 10:-0.970149 11:1 13:-0.568 14:-0.84 
+1 1:-1 2:-0.796992 3:-0.154643 5:0.0769231 6:0.75 7:-0.578947 8:1 9:-1 10:-1 11:-1 13:-0.66 14:-1 
-1 1:-1 2:-0.503759 3:-0.607143 5:-0.538462 6:-0.25 7:-0.614035 8:-1 9:-1 10:-1 11:1 12:-1 13:-0.9 14:-1 
-1 1:-1 2:-0.674286 3:-0.952143 5:-0.230769 6:0.75 7:-0.877193 8:1 9:-1 10:-1 11:-1 13:-0.6 14:-1 
+1 1:1 2:-0.716692 3:-0.205357 5:1 6:0.75 7:-0.967719 8:1 9:1 10:-0.970149 11:-1 13:-0.9 14:-1 
-1 1:-1 2:-0.46406 3:-0.196429 5:-1 6:-1 7:-1 8:-1 9:-1 10:-1 11:-1 13:-0.816 14:-0.896 
+1 1:-1 2:-0.441203 3:-0.961429 5:0.846154 6:-0.25 7:-0.997193 8:1 9:-1 10:-1 11:-1 13:-0.56 14:-0.77646 
+1 1:1 2:-0.694135 3:-0.892857 5:-0.846154 6:0.75 7:-0.868421 8:1 9:1 10:-0.820896 11:-1 13:-0.8 14:-0.99346 
+1 1:1 2:-0.308271 3:-0.991071 4:-1 5:0.0769231 6:-0.25 7:-0.894737 8:-1 9:-1 10:-1 11:1 13:-0.768 14:-0.99774 
-1 1:1 2:-0.516391 3:-0.910714 4:-1 5:-0.538462 6:-0.25 7:-0.982456 8:-1 9:-1 10:-1 11:-1 13:-0.776 14:-1 
+1 1:-1 2:-0.689323 3:-0.964286 5:0.538462 6:0.75 7:-0.912281 8:1 9:1 10:-0.970149 11:-1 13:-1 14:-0.98644 
-1 1:1 2:-0.776842 3:-0.982143 4:-1 5:0.0769231 6:0.75 7:-0.982456 8:-1 9:-1 10:-1 11:-1 13:-0.72 14:-0.99592 
-1 1:1 2:-0.468571 3:0.107143 5:0.0769231 6:-0.25 7:-0.964912 8:1 9:-1 10:-1 11:-1 13:-0.88 14:-1 
+1 1:1 2:-0.726917 3:-0.785714 5:-0.0769231 6:-0.25 7:-0.909474 8:1 9:1 10:-0.970149 11:-1 13:-0.74 14:-0.984 
-1 1:1 2:-0.285714 3:-0.875 4:-1 5:0.0769231 7:-0.982456 8:1 9:-1 10:-1 11:1 13:-0.836 14:-0.992 
-1 1:-1 2:-0.666767 3:-0.678571 5:0.230769 6:-0.25 7:-0.929825 8:-1 9:-1 10:-1 11:1 13:-0.64 14:-0.99988 
-1 1:1 2:-0.320902 3:-0.729286 5:0.230769 6:-0.25 7:-0.918246 8:1 9:-1 10:-1 11:1 13:-0.8 14:-1 
+1 1:-1 2:0.0075188 3:-0.946429 5:0.538462 6:0.75 7:-0.807018 8:1 9:1 10:-0.970149 11:-1 13:-0.667 14:-0.98216 
-1 1:1 2:-0.448722 3:-0.714286 4:-1 5:0.846154 6:-0.25 7:-0.894737 8:-1 9:-1 10:-1 11:1 13:-0.88 14:-1 
-1 1:-1 2:-0.493835 3:-0.238214 5:0.538462 6:0.75 7:-0.994035 8:-1 9:1 10:-0.641791 11:1 13:-0.871 14:-0.99994 
+1 1:1 2:-0.576541 3:-0.89 5:0.230769 6:-0.25 7:-0.736842 8:1 9:1 10:-0.850746 11:1 13:-0.9 14:-0.99994 
-1 1:1 2:0.235489 3:0.107143 5:0.384615 6:1 7:-1 8:1 9:1 10:-0.402985 11:-1 13:-0.848 14:-0.9974 
+1 1:1 2:-0.929925 3:-0.946429 5:0.0769231 6:-0.25 7:-0.877193 8:1 9:1 10:-0.850746 11:1 13:-0.648 14:-0.9862 
-1 1:1 2:-0.674286 3:-0.107143 5:0.230769 6:-0.25 7:-0.938596 8:1 9:-1 10:-1 11:1 13:-0.74 14:-1 
+1 1:1 2:-0.430978 3:-0.607143 5:0.538462 6:0.75 7:-0.614035 8:1 9:1 10:-0.641791 11:1 13:-0.592 14:-0.98 
+1 1:1 2:-0.506165 3:-0.964286 5:0.0769231 6:-0.25 7:-0.877193 8:1 9:1 10:-0.671642 11:-1 13:-0.968 14:-0.9892 
-1 1:1 2:-0.744361 3:-0.967143 5:-0.538462 6:-0.25 7:-0.991228 8:-1 9:-1 10:-1 11:1 13:-0.72 14:-0.9989 
+1 1:1 2:-0.157895 3:-0.931429 5:1 6:-0.25 7:-0.824561 8:1 9:-1 10:-1 11:-1 13:-0.49 14:-0.988 
-1 1:1 2:-0.310677 3:-0.857143 5:-0.692308 6:-0.25 7:-0.982456 8:-1 9:-1 10:-1 11:1 13:-0.779 14:-1 
-1 1:1 2:-0.636692 3:-0.0832143 5:0.846154 6:-0.25 7:-0.964912 8:-1 9:-1 10:-1 11:-1 13:-1 14:-0.99996 
+1 1:1 2:-0.513684 3:-0.868929 5:0.0769231 6:0.75 7:-0.695789 8:1 9:-1 10:-1 11:-1 13:-0.74 14:-0.996 
-1 1:1 2:-0.809624 3:-0.982143 5:0.538462 6:-0.25 7:-0.991228 8:-1 9:-1 10:-1 11:-1 13:-0.8 14:-1 
+1 1:1 2:-0.821955 3:-0.973214 5:0.538462 6:-0.25 7:-0.859649 8:1 9:1 10:-0.940299 11:1 13:-0.92 14:-1 
+1 1:1 2:0.132932 3:-0.997143 5:1 6:0.75 7:-0.997193 8:1 9:-1 10:-1 11:-1 13:-1 14:-0.94 
-1 1:1 2:0.473684 3:-0.5 5:0.384615 6:1 7:-1 8:-1 9:-1 10:-1 11:-1 13:-1 14:-0.99976 
-1 1:1 2:-0.193083 3:-0.765 5:-0.0769231 6:-0.25 7:-0.754386 8:-1 9:-1 10:-1 11:1 12:-1 13:-0.6 14:-1 
-1 1:-1 2:-0.922406 3:-0.985 5:-0.230769 6:-0.25 7:-0.991228 8:-1 9:-1 10:-1 11:-1 13:-0.8 14:-0.99998 
-1 1:1 2:-0.526316 3:-0.958571 5:0.230769 6:-0.25 7:-0.979649 8:-1 9:1 10:-0.970149 11:-1 13:-0.66 14:-0.94394 
-1 1:1 2:-0.390977 3:-0.678571 5:-0.230769 6:-0.25 7:-0.929825 8:1 9:-1 10:-1 11:1 13:-0.76 14:-1 
+1 1:-1 2:0.739248 3:-1 5:0.0769231 6:-0.25 7:-1 8:-1 9:-1 10:-1 11:-1 12:1 13:-0.816 14:-1 
+1 1:1 2:-0.150376 3:-0.985357 5:-0.692308 6:0.75 7:-0.640351 8:1 9:-1 10:-1 11:-1 13:-0.6 14:-1 
-1 1:-1 2:-0.736842 3:-0.214286 4:-1 5:0.538462 6:-0.25 7:-0.789474 8:1 9:-1 10:-1 11:1 13:-0.732 14:-1 
-1 1:1 2:-0.679098 3:-0.857143 5:0.384615 6:-0.75 7:-0.988421 8:-1 9:1 10:-0.940299 11:-1 13:-0.68 14:-0.974 
+1 1:1 2:-0.0803007 3:-0.964286 5:-0.692308 6:0.75 7:-0.649123 8:1 9:-1 10:-1 11:1 13:-0.68 14:-1 
+1 1:-1 2:-0.721805 3:-0.160714 5:1 6:0.75 7:-0.964912 8:1 9:1 10:-0.940299 11:1 13:-0.7 14:-0.98898 
-1 1:1 2:-0.378346 3:-0.904643 5:-0.692308 7:-0.991228 8:-1 9:-1 10:-1 11:1 13:-0.56 14:-0.91 
+1 1:1 2:-0.719398 3:-0.178571 5:-0.692308 6:-0.25 7:-0.754386 8:1 9:1 10:-0.731343 11:-1 13:-0.944 14:-0.98516 
-1 1:1 2:-0.633985 3:-0.9375 5:-0.538462 6:-0.25 7:-0.973684 8:-1 9:1 10:-0.940299 11:1 13:-0.826 14:-0.99994 
+1 1:-1 2:-0.884812 3:-0.357143 5:-0.230769 6:-0.25 7:-0.903509 8:1 9:-1 10:-1 11:1 13:-1 14:-1 
-1 1:1 2:-0.799398 3:-0.9225 5:0.538462 6:-0.25 7:-0.894737 8:-1 9:-1 10:-1 11:-1 13:-0.892 14:-0.99986 
+1 1:1 2:-0.461053 3:0.154643 5:-0.846154 6:-0.25 7:-0.789474 8:1 9:1 10:-0.731343 11:-1 13:-0.75 14:-0.9854 
-1 1:-1 2:0.318196 3:-0.857143 5:-1 6:-1 7:-0.54386 8:-1 9:1 10:-0.970149 11:-1 13:-1 14:-0.9998 
+1 1:1 2:0.381053 3:-0.89 5:0.538462 6:-0.25 7:-0.991228 8:1 9:-1 10:-1 11:1 13:-0.74 14:-1 
+1 1:-1 2:0.546466 5:-1 6:-1 7:-1 8:1 9:1 10:-0.671642 11:1 13:-1 14:-0.972 
-1 1:1 2:-0.508872 3:-0.925714 4:-1 5:-0.692308 7:-0.964912 8:1 9:1 10:-0.701493 11:1 13:-0.868 14:-0.99944 
+1 1:1 2:0.0475189 3:-0.535714 5:0.538462 6:0.75 7:-0.578947 8:1 9:-1 10:-1 11:1 13:-0.65 14:-1 
-1 1:-1 2:-0.704361 3:-0.178571 4:-1 5:-0.538462 6:0.75 7:-0.789474 8:-1 9:-1 10:-1 11:1 13:-0.98 14:-0.99968 
+1 1:1 2:-0.806917 3:-0.339286 5:0.0769231 6:-0.25 7:-0.883158 8:1 9:1 10:-0.910448 11:1 13:-0.96 14:-0.99944 
+1 1:1 2:0.0351879 3:-0.455357 5:0.230769 6:0.75 7:0.0877193 8:1 9:1 10:-0.641791 11:-1 13:-1 14:-0.9842 
+1 1:1 2:-0.714286 3:-0.892857 5:0.538462 6:-0.25 7:-0.833333 8:1 9:1 10:-0.910448 11:1 13:-1 14:-0.98836 
-1 1:1 2:-0.443609 4:-1 5:-1 6:-1 7:-1 8:-1 9:1 10:-0.940299 11:-1 13:-0.84 14:-0.99998 
-1 1:1 2:-0.403609 3:-0.976071 4:-1 5:0.846154 6:-0.25 7:-0.994035 8:-1 9:-1 10:-1 11:-1 13:-0.82 14:-1 
-1 1:1 2:-0.704361 3:-0.967143 4:-1 5:0.230769 6:-0.25 7:-0.815789 8:1 9:1 10:-0.820896 11:1 13:-0.792 14:-0.99306 
-1 1:1 2:-0.904662 3:-0.976071 4:-1 5:-0.538462 6:-0.25 7:-0.979649 8:-1 9:-1 10:-1 11:-1 12:-1 13:-0.8 14:-1 
-1 1:-1 2:-0.787068 3:-0.392857 5:0.0769231 6:-0.25 7:-0.988421 8:-1 9:-1 10:-1 11:-1 13:-1 14:-0.99298 
+1 1:-1 2:0.408421 3:0.178571 5:0.538462 6:-0.25 7:-0.22807 8:1 9:-1 10:-1 11:1 13:-0.979 14:-0.78878 
-1 1:1 2:-0.46406 3:-0.642857 4:-1 5:-0.230769 6:-0.25 7:-0.403509 8:1 9:-1 10:-1 11:-1 13:-1 14:-1 
+1 1:-1 2:-0.661654 3:-0.119286 5:0.846154 6:0.75 7:-0.754386 8:1 9:1 10:-0.820896 11:-1 13:-0.6 14:-0.99084 
-1 1:1 2:-0.766917 3:-0.303571 5:0.0769231 6:-0.25 7:-0.982456 8:1 9:-1 10:-1 11:-1 13:-0.86 14:-1 
-1 1:1 2:-0.799398 3:-1 5:0.0769231 6:-0.25 7:-1 8:-1 9:-1 10:-1 11:-1 12:1 13:-0.816 14:-1 
-1 1:-1 2:-0.654135 3:-0.0357143 4:-1 5:-1 6:-1 7:-0.859649 8:-1 9:1 10:-0.970149 11:1 13:-0.8 14:-0.99998 
+1 1:1 2:-0.125413 3:-0.669643 5:0.538462 6:-0.25 7:-0.678596 8:1 9:-1 10:-1 11:-1 12:-1 13:-1 14:-1 
+1 1:1 2:-0.611429 3:-0.875 4:-1 5:0.0769231 6:-0.25 7:-0.929825 8:1 9:1 10:-0.850746 11:1 13:-0.84 14:-0.88446 
+1 1:1 2:0.325714 3:-0.497143 5:-0.0769231 6:-0.25 7:-0.0175439 8:1 9:1 10:-0.820896 11:1 13:-0.64 14:-0.97336 
+1 1:1 2:0.268271 3:-0.178571 5:-1 6:-1 7:-0.649123 8:1 9:1 10:-0.850746 11:-1 13:-1 14:-0.82298 
+1 1:1 2:0.130226 3:-0.285714 5:-0.692308 7:-1 8:1 9:1 10:-0.671642 11:-1 13:-1 14:-0.97502 
-1 1:1 2:-0.215639 3:-0.964286 5:-0.0769231 6:-0.25 7:-0.982456 8:1 9:-1 10:-1 11:-1 12:-1 13:-0.712 14:-1 
+1 1:1 2:-0.58406 3:-0.854286 4:-1 5:-0.230769 6:-0.25 7:-0.859649 8:1 9:1 10:-0.910448 11:1 13:-0.63 14:-0.9888 
+1 1:1 2:-0.506165 3:-0.535714 5:0.846154 6:-0.25 7:-0.780702 8:1 9:1 10:-0.761194 11:-1 13:-0.67 14:-0.976 
-1 1:1 2:0.145263 3:-0.854286 4:-1 5:-1 6:-1 7:-0.894737 8:-1 9:-1 10:-1 11:-1 13:-0.88 14:-0.99998 
-1 1:-1 2:-0.661654 3:-0.214286 4:-1 5:-0.230769 6:-0.25 7:-0.684211 8:1 9:-1 10:-1 11:-1 13:-0.88 14:-1 
-1 1:1 2:-0.521203 3:-0.946429 4:-1 5:0.0769231 6:-0.25 7:-0.997193 8:-1 9:-1 10:-1 11:-1 13:-0.76 14:-1 
+1 1:-1 2:-0.400902 3:-0.973214 5:0.846154 6:-0.25 7:-0.973684 8:-1 9:-1 10:-1 11:-1 13:-0.7 14:-0.99912 
+1 1:1 2:-0.639098 3:-0.946429 5:0.0769231 7:-0.982456 8:1 9:-1 10:-1 11:-1 13:-0.651 14:-0.99954 
+1 1:-1 2:-0.551278 3:-0.925714 5:0.0769231 6:-0.25 7:-0.824561 8:1 9:1 10:-0.850746 11:1 13:-0.7 14:-0.9714 
+1 1:-1 2:-0.869774 3:-0.973214 4:1 5:0.846154 6:-1 7:-0.298246 8:-1 9:-1 10:-1 11:1 12:-1 13:-0.7 14:-1 
+1 1:1 2:-0.799398 3:-0.5 5:0.0769231 6:-0.25 7:-0.885965 8:1 9:1 10:-0.910448 11:-1 13:-0.8 14:-0.97218 
+1 1:1 2:-0.887218 3:0.571429 4:1 5:-1 6:0.5 7:-1 8:-1 9:-1 10:-1 11:1 12:1 13:-0.55 14:1 
-1 1:1 2:-0.869774 3:-0.517857 4:-1 5:-0.0769231 6:-0.25 7:-0.997193 8:-1 9:-1 10:-1 11:-1 13:-0.86 14:-1 
+1 1:1 2:0.0201503 3:-0.821429 5:-0.0769231 7:-0.824561 8:1 9:1 10:-0.641791 11:1 13:-0.59 14:-0.9498 
+1 1:1 2:0.313383 3:-0.392857 5:0.384615 6:0.75 7:-0.508772 8:1 9:1 10:-0.910448 11:-1 13:-1 14:-1 
+1 1:1 2:-1 3:-0.714286 4:-1 5:0.230769 6:-0.25 7:-0.877193 8:1 9:1 10:-0.940299 11:1 13:-0.88 14:-0.98 
+1 1:1 2:-0.83218 3:-0.321429 5:0.538462 6:-0.25 7:-0.929825 8:1 9:-1 10:-1 11:1 13:-0.94 14:-0.992 
-1 1:-1 2:-0.754286 3:-0.166786 5:-0.538462 6:0.75 7:-0.994035 8:-1 9:-1 10:-1 11:-1 13:-0.68 14:-0.9999 
-1 1:1 2:-0.884812 3:-0.285714 5:0.230769 6:0.75 7:-0.988421 8:-1 9:1 10:-0.970149 11:-1 13:-0.88 14:-0.99998 
-1 1:1 2:-0.366015 3:-0.821429 4:-1 5:0.230769 6:-0.25 7:-0.789474 8:-1 9:-1 10:-1 11:-1 12:-1 13:-0.8 14:-1 
-1 1:1 2:-0.536241 3:-0.75 5:0.230769 6:-0.25 7:-0.754386 8:1 9:1 10:-0.910448 11:1 13:-0.671 14:-1 
-1 1:1 2:-0.769323 3:-0.946429 4:-1 5:0.692308 6:0.5 7:-0.947368 8:-1 9:-1 10:-1 11:1 13:-0.868 14:-0.99996 
-1 1:1 2:-0.867068 3:-0.267857 5:0.0769231 6:0.75 7:-0.92386 8:-1 9:-1 10:-1 11:-1 13:-0.68 14:-0.99974 
-1 1:1 2:-0.571429 3:-0.785714 5:0.230769 6:-0.25 7:-0.947368 8:-1 9:-1 10:-1 11:1 13:-0.7 14:-0.99866 
+1 1:-1 2:-0.0351879 3:-0.25 5:0.538462 6:-0.25 7:-0.649123 8:1 9:1 10:-0.791045 11:1 13:-1 14:-1 
-1 1:1 2:-0.729323 3:-0.178571 5:-0.692308 6:-0.25 7:-0.970877 8:-1 9:-1 10:-1 11:-1 13:-1 14:-1 
-1 1:-1 2:-0.46406 3:-0.75 5:-0.846154 6:-0.25 7:-0.789474 8:1 9:-1 10:-1 11:1 13:-0.7 14:-1 
+1 1:-1 2:-0.799398 3:-0.464286 5:-0.538462 6:-0.25 7:-0.894737 8:1 9:1 10:-0.970149 11:-1 13:-0.84 14:-0.99532 
+1 1:-1 2:-0.774436 3:-0.833214 5:-0.692308 7:-0.964912 8:1 9:1 10:-0.880597 11:-1 12:-1 13:-0.92 14:-1 
+1 1:1 2:-0.611429 3:-0.696429 5:0.846154 6:-0.25 7:-0.698947 8:1 9:1 10:-0.970149 11:1 13:-0.88 14:-1 
-1 1:-1 2:-0.591579 3:-0.881071 5:-1 6:-1 7:-1 8:-1 9:-1 10:-1 11:-1 13:-0.66 14:-0.99998 
+1 1:1 2:-0.14797 3:-0.925714 5:0.230769 6:-0.25 7:-0.649123 8:1 9:1 10:-0.820896 11:1 13:-0.5 14:-0.8 
-1 1:-1 2:-0.864662 3:-0.285714 5:0.230769 6:-0.25 7:-0.929825 8:-1 9:1 10:-0.970149 11:-1 13:-0.88 14:-0.99998 
-1 1:-1 2:-0.556391 3:-0.928571 5:0.538462 6:-0.25 7:-0.929825 8:1 9:1 10:-0.940299 11:1 13:-0.833 14:-0.99 
+1 1:-1 2:-0.766917 3:-0.571429 5:-0.230769 6:-0.25 7:-0.824561 8:1 9:1 10:-0.910448 11:-1 13:-0.92 14:-0.98164 
+1 1:1 2:-0.756992 3:-0.214286 5:1 6:-0.25 7:-0.979649 8:1 9:1 10:-0.820896 11:-1 13:-0.879 14:-1 
-1 1:1 2:-0.754286 3:-0.964286 5:0.0769231 6:-0.25 7:-0.991228 8:-1 9:-1 10:-1 11:-1 13:-0.64 14:-1 
+1 1:1 2:-0.430978 3:-0.357143 4:-1 5:0.230769 6:0.75 7:-0.631579 8:1 9:-1 10:-1 11:1 13:-0.846 14:-1 
-1 1:-1 2:-0.0502255 3:-0.928571 5:0.538462 6:-0.25 7:-0.991228 8:-1 9:-1 10:-1 11:1 13:-0.737 14:-1 
-1 1:-1 2:-0.704361 3:-0.958214 4:-1 5:-1 6:-1 7:-0.991228 8:-1 9:-1 10:-1 11:-1 13:-0.88 14:-0.99826 
-1 1:-1 2:-0.874586 3:-0.961429 5:0.0769231 6:-0.25 7:-0.877193 8:-1 9:1 10:-0.970149 11:1 13:-0.92 14:-0.9999 
-1 1:1 2:-0.421053 3:-0.821429 4:-1 5:0.230769 6:-0.25 7:-0.508772 8:-1 9:-1 10:-1 11:1 13:-0.72 14:-1 
-1 1:-1 2:-0.731729 3:-0.976071 5:0.538462 6:-0.25 7:-0.947368 8:-1 9:-1 10:-1 11:-1 12:-1 13:-0.84 14:-1 
-1 1:1 2:-0.370827 3:-0.922857 5:-0.0769231 6:-0.25 7:-0.918246 8:-1 9:-1 10:-1 11:-1 12:-1 13:-0.972 14:-1 
+1 1:1 2:-0.521203 3:-0.898929 5:0.230769 6:0.75 7:-0.947368 8:1 9:1 10:-0.970149 11:-1 13:-0.76 14:-0.998 
-1 1:1 2:-0.456241 3:-0.821429 5:-0.230769 6:-0.25 7:-0.473684 8:1 9:-1 10:-1 11:1 13:-0.477 14:-1 
+1 1:-1 2:-0.79188 3:-0.868929 5:0.538462 6:-0.25 7:-0.853684 8:1 9:1 10:-0.850746 11:-1 13:-0.78 14:-0.94994 
-1 1:1 2:-0.398496 3:-0.803571 5:-0.692308 7:-1 8:-1 9:-1 10:-1 11:-1 13:-0.82 14:-1 
+1 1:1 2:-0.749474 3:-0.940714 5:0.0769231 6:0.75 7:-0.84807 8:-1 9:-1 10:-1 11:1 13:-0.872 14:-1 
+1 1:-1 2:-0.348271 3:-0.142857 5:0.538462 6:0.75 7:-0.0175439 8:1 9:1 10:-0.761194 11:-1 13:-1 14:-0.8682 
+1 1:1 2:-0.453534 3:-0.681429 5:0.846154 6:0.75 7:-0.57614 8:1 9:1 10:-0.910448 11:-1 13:-0.689 14:-0.994 
-1 1:-1 2:-0.731729 3:-0.943571 5:-0.692308 6:-0.25 7:-0.994035 8:-1 9:-1 10:-1 11:-1 13:-0.856 14:-1 
-1 1:1 2:-0.611429 3:0.0417857 5:-0.692308 7:-1 8:-1 9:-1 10:-1 11:1 13:-0.822 14:-1 
+1 1:1 2:-0.0902256 3:-0.857143 5:-0.0769231 6:-0.25 7:-0.877193 8:1 9:1 10:-0.940299 11:1 13:-1 14:-0.9997 
-1 1:1 2:-0.506165 3:-0.9225 4:-1 5:0.0769231 6:-0.25 7:-0.997193 8:-1 9:-1 10:-1 11:-1 13:-0.83 14:-0.99642 
-1 1:1 2:-0.278195 3:-0.5 5:0.538462 6:0.75 7:-0.192982 8:1 9:1 10:-0.791045 11:1 13:-0.7 14:-0.9999 
-1 1:1 2:-0.89985 3:-0.993929 4:-1 5:0.0769231 6:-0.25 7:-0.997193 8:-1 9:-1 10:-1 11:-1 13:-0.86 14:-0.98556 
-1 1:1 2:0.0652631 3:-0.836429 5:-1 6:-1 7:-0.979649 8:-1 9:-1 10:-1 11:-1 13:-0.8 14:-0.99994 
-1 1:1 2:-0.724211 3:-0.987857 5:-0.0769231 6:-0.25 7:-0.994035 8:-1 9:-1 10:-1 11:-1 12:-1 13:-1 14:-1 
-1 1:-1 2:-0.366015 3:-0.910714 4:-1 5:-0.692308 6:0.75 7:-0.964912 8:-1 9:-1 10:-1 11:1 13:-0.84 14:-1 
-1 1:1 2:-0.0827068 3:-0.214286 4:-1 5:-0.846154 6:-0.25 7:-0.894737 8:1 9:-1 10:-1 11:-1 12:-1 13:-1 14:-1 
+1 1:1 2:0.37594 3:-0.803571 5:0.230769 6:-0.25 7:-0.877193 8:1 9:1 10:-0.850746 11:1 13:-0.94 14:-0.99884 
+1 1:1 2:-0.646617 3:-0.973214 5:-0.0769231 6:-0.25 7:-0.982456 8:1 9:1 10:-0.910448 11:-1 13:-0.74 14:-0.69784 
-1 1:-1 2:-0.163007 3:-0.925714 5:-0.230769 6:-0.25 7:-0.953333 8:-1 9:-1 10:-1 11:-1 13:-0.76 14:-0.99526 
-1 1:1 2:0.077594 3:0.357143 5:-1 6:-1 7:-1 8:1 9:1 10:-0.970149 11:-1 13:-0.906 14:-1 
-1 1:-1 2:-0.393384 3:-0.886786 4:-1 5:-1 6:-1 7:-1 8:1 9:-1 10:-1 11:-1 13:-0.68 14:-1 
-1 1:1 2:-0.836992 3:-0.714286 4:-1 5:-0.692308 6:-0.25 7:-0.929825 8:-1 9:-1 10:-1 11:1 13:-0.64 14:-0.98 
-1 1:-1 2:-0.676692 3:-0.8275 4:-1 5:0.0769231 6:-0.25 7:-1 8:-1 9:-1 10:-1 11:-1 13:-0.88 14:-1 
+1 1:1 2:-0.71188 3:-0.892857 5:0.0769231 6:0.75 7:-0.900702 8:1 9:-1 10:-1 11:-1 13:-0.578 14:-0.996 
-1 1:1 2:0.666767 3:-0.357143 5:-1 6:-1 7:-0.719298 8:-1 9:1 10:-0.970149 11:-1 13:-0.93 14:-0.99988 
+1 1:1 2:0.0201503 3:-0.979286 5:0.0769231 7:0.0526316 8:1 9:1 10:-0.402985 11:-1 13:-1 14:-0.7 
-1 1:-1 2:-0.413534 3:-0.821429 4:-1 5:0.0769231 6:-0.25 7:-0.824561 8:-1 9:-1 10:-1 11:1 13:-1 14:-0.99996 
+1 1:1 2:-0.112782 3:-0.785714 5:0.538462 6:0.75 7:-0.578947 8:1 9:1 10:-0.671642 11:-1 13:-0.92 14:-1 
-1 1:1 2:-0.721805 3:-0.955357 4:-1 5:-0.230769 6:-0.25 7:-0.991228 8:1 9:-1 10:-1 11:-1 13:-0.82 14:-0.99998 
-1 1:1 2:-0.368421 3:-0.821429 5:0.846154 7:-0.964912 8:-1 9:-1 10:-1 11:-1 13:-0.652 14:-1 
+1 1:1 2:0.28812 3:0.321429 5:-0.846154 7:0.0526316 8:1 9:1 10:-0.492537 11:1 13:-1 14:-1 
+1 1:-1 2:-0.0851128 3:-0.523929 5:0.538462 6:-0.25 7:-0.482456 8:1 9:1 10:-0.910448 11:1 13:-1 14:-1 
+1 1:-1 2:-0.0803007 3:-1 5:0.0769231 6:-0.25 7:-0.824561 8:1 9:-1 10:-1 11:-1 13:-1 14:-1 
-1 1:1 2:-0.383459 3:-0.875 5:0.230769 7:-0.982456 8:1 9:-1 10:-1 11:1 13:-0.837 14:-1 
-1 1:-1 2:-0.0601504 3:-0.6725 5:-0.538462 6:0.75 7:-0.929825 8:-1 9:-1 10:-1 11:1 12:-1 13:-0.76 14:-1 
-1 1:1 2:-0.493835 3:-0.806429 4:-1 5:-0.0769231 6:-0.25 7:-0.991228 8:-1 9:-1 10:-1 11:1 12:-1 13:-0.92 14:-1 
-1 1:1 2:-0.581353 3:-0.946429 5:0.538462 6:0.75 7:-0.988421 8:-1 9:-1 10:-1 11:1 13:-0.78 14:-0.99498 
-1 1:1 2:-0.829474 3:-0.482143 5:-0.0769231 6:-0.25 7:-0.997193 8:-1 9:1 10:-0.970149 11:-1 13:-0.9 14:-0.99998 
+1 1:-1 2:-0.170526 3:-0.928571 5:-0.692308 7:-0.842105 8:1 9:-1 10:-1 11:1 13:-1 14:-0.994 
-1 1:-1 2:-0.706767 3:-0.892857 5:0.230769 6:-0.25 7:-0.938596 8:-1 9:-1 10:-1 11:1 13:-0.84 14:-1 
+1 1:1 2:-0.461053 3:-0.940714 5:1 6:-0.25 7:-0.906316 8:1 9:1 10:-0.761194 11:1 13:-0.697 14:-0.9342 
+1 1:-1 2:-0.877293 3:-0.214286 5:1 6:0.75 7:-0.929825 8:1 9:1 10:-0.671642 11:-1 13:-1 14:-0.94 
-1 1:-1 2:-0.41594 3:-0.839286 4:-1 5:0.846154 6:-0.25 7:-0.754386 8:-1 9:-1 10:-1 11:1 13:-0.8 14:-0.99718 
-1 1:-1 2:0.165414 3:-0.5 5:-0.230769 6:0.75 7:-0.789474 8:-1 9:-1 10:-1 11:-1 13:-1 14:-1 
-1 1:-1 2:-0.649023 3:-0.919643 5:0.538462 6:-0.25 7:-0.909474 8:1 9:1 10:-0.940299 11:-1 13:-0.8 14:-1 
-1 1:1 2:-0.193083 3:-0.892857 5:-0.692308 7:-1 8:-1 9:-1 10:-1 11:-1 12:-1 13:-0.7 14:-1 
-1 1:1 2:-0.694135 3:-0.958214 4:-1 5:0.846154 6:0.75 7:-0.991228 8:-1 9:-1 10:-1 11:-1 13:-0.76 14:-0.99998 
+1 1:1 2:0.270677 3:-0.107143 5:-0.538462 6:0.75 7:-0.438596 8:1 9:-1 10:-1 11:1 13:-0.976 14:-0.95944 
+1 1:-1 2:-0.556391 3:-0.782857 4:-1 5:1 6:0.75 7:-0.821754 8:1 9:1 10:-0.970149 11:-1 13:-0.93 14:-1 
+1 1:1 2:-0.448722 3:-0.714286 5:-0.0769231 6:-0.25 7:-0.824561 8:1 9:-1 10:-1 11:1 13:-0.64 14:-1 
-1 1:1 2:-0.776842 3:-0.9375 4:-1 5:0.0769231 6:0.75 7:-0.982456 8:-1 9:-1 10:-1 11:-1 13:-0.72 14:-0.99592 
+1 1:1 2:-0.385865 3:-0.345 5:0.0769231 6:-0.25 7:-0.684211 8:1 9:1 10:-0.641791 11:1 13:-1 14:-0.99558 
-1 1:1 2:-0.112782 3:0.800714 5:0.538462 6:0.75 7:-0.985263 8:1 9:1 10:-0.970149 11:-1 13:-0.24 14:-0.9982 
+1 1:-1 2:-0.263158 3:-0.571429 5:-0.538462 6:-0.25 7:-0.929825 8:1 9:-1 10:-1 11:1 13:-1 14:-1 
+1 1:1 2:-0.28812 3:-0.854286 5:0.230769 6:-0.25 7:-0.997193 8:1 9:-1 10:-1 11:1 13:-0.6 14:-0.884 
-1 1:1 2:-0.516391 3:-0.854286 4:-1 5:1 6:0.75 7:-0.997193 8:-1 9:-1 10:-1 11:-1 13:-0.872 14:-0.99998 
-1 1:1 2:-0.290827 3:-0.809643 5:0.846154 6:-0.25 7:-0.988421 8:-1 9:-1 10:-1 11:1 13:-1 14:-0.98998 
+1 1:1 2:-0.471278 3:0.392857 5:0.0769231 6:-0.25 7:-0.508772 8:1 9:1 10:-0.522388 11:-1 13:-1 14:-0.9 
-1 1:1 2:-0.328421 3:-0.818571 5:-1 6:-1 7:-1 8:-1 9:-1 10:-1 11:-1 13:-1 14:-0.98 
+1 1:1 2:-0.796992 3:-0.8275 5:0.0769231 6:-0.25 7:-0.859649 8:1 9:1 10:-0.671642 11:1 13:-0.8 14:-0.94 
-1 1:1 2:0.00511272 3:-0.583214 5:0.230769 6:-0.25 7:-0.614035 8:-1 9:-1 10:-1 11:-1 13:-0.535 14:-0.997 
-1 1:1 2:-0.75188 3:-0.440357 4:-1 5:-0.692308 7:-0.988421 8:-1 9:-1 10:-1 11:1 13:-0.816 14:-1 
+1 1:1 2:-0.796992 3:-0.285714 4:-1 5:0.0769231 6:-0.25 7:-0.824561 8:1 9:-1 10:-1 11:-1 12:-1 13:-0.96 14:-1 
+1 1:1 2:-0.363308 3:-0.821429 5:0.230769 6:-0.25 7:-1 8:1 9:-1 10:-1 11:1 13:-0.761 14:-0.996 
-1 1:1 2:-0.689323 3:-0.9375 5:-0.0769231 6:-0.25 7:-0.994035 8:-1 9:1 10:-0.880597 11:-1 13:-0.746 14:-0.961 
+1 1:1 2:-0.290827 3:-0.535714 5:-0.0769231 6:0.75 7:-0.701754 8:1 9:1 10:-0.641791 11:1 13:-0.907 14:-1 
-1 1:-1 2:-0.789474 3:-0.318571 5:-0.692308 6:-0.25 7:-0.997193 8:-1 9:-1 10:-1 11:-1 13:-0.8 14:-0.98 
+1 1:1 2:-0.310677 3:-0.767857 5:0.538462 6:0.75 7:-0.368421 8:1 9:-1 10:-1 11:1 13:-0.898 14:-0.98722 
+1 1:1 2:-0.734436 3:-0.282857 5:1 6:-0.25 7:-0.997193 8:1 9:1 10:-0.731343 11:-1 13:-0.94 14:-0.99208 
+1 1:-1 2:-0.60391 3:-0.0357143 5:0.538462 6:0.75 7:-0.649123 8:1 9:1 10:-0.940299 11:-1 13:-1 14:-0.9 
+1 1:-1 2:-0.00992487 3:-0.967143 5:0.846154 6:0.75 7:-0.970877 8:1 9:1 10:-0.671642 11:1 13:-0.56 14:-0.99988 
-1 1:-1 2:0.155489 3:-1 4:-1 5:-1 6:-1 7:-1 8:-1 9:-1 10:-1 11:-1 13:-1 14:-1 
-1 1:1 2:-0.235489 3:-0.821429 4:-1 5:-0.692308 6:0.75 7:-0.298246 8:-1 9:-1 10:-1 11:1 12:-1 13:-0.8 14:-1 
+1 1:1 2:-0.235489 3:-0.883929 5:0.0769231 6:-0.25 7:-0.894737 8:1 9:1 10:-0.701493 11:-1 13:-0.814 14:-0.906 
-1 1:-1 2:-0.581353 3:-0.854286 5:0.230769 6:-0.25 7:-0.982456 8:-1 9:-1 10:-1 11:1 13:-0.82 14:-0.999 
+1 1:1 2:-0.836992 3:-0.321429 5:0.230769 6:-0.25 7:-0.894737 8:1 9:-1 10:-1 11:-1 13:-0.88 14:-0.95588 
+1 1:1 2:-0.225564 3:-0.696429 5:0.0769231 7:-0.54386 8:1 9:1 10:-0.522388 11:-1 13:-0.883 14:-0.9758 
-1 1:1 2:-0.318196 3:-0.946429 4:-1 5:-0.846154 6:-0.25 7:-0.958947 8:-1 9:-1 10:-1 11:-1 13:-0.76 14:-0.99994 
+1 1:1 2:-0.626466 3:-0.982143 5:-0.692308 7:-1 8:1 9:-1 10:-1 11:1 13:-1 14:-1 
-1 1:1 2:-0.22797 3:-0.877857 4:-1 5:-0.0769231 6:-0.25 7:-0.988421 8:-1 9:-1 10:-1 11:-1 12:-1 13:-0.6 14:-1 
+1 1:1 2:-0.152782 3:-0.97 5:0.0769231 6:0.75 7:-0.985263 8:1 9:1 10:-0.820896 11:-1 13:-0.78 14:-0.98104 
+1 1:1 2:-0.77203 3:-0.464286 5:-0.230769 6:-0.25 7:-0.900702 8:1 9:1 10:-0.970149 11:-1 13:-0.92 14:-0.804 
-1 1:-1 2:-0.809624 3:-0.910714 5:0.0769231 6:-0.25 7:-1 8:-1 9:-1 10:-1 11:-1 13:-1 14:-1 
-1 1:-1 2:-0.58406 3:-0.785714 5:-0.0769231 6:-0.25 7:-0.804211 8:-1 9:1 10:-0.970149 11:1 13:-0.72 14:-0.9998 
-1 1:1 2:-0.764511 3:-0.943571 4:-1 5:0.846154 6:-0.25 7:-0.953333 8:-1 9:-1 10:-1 11:-1 13:-0.84 14:-1 
+1 1:1 2:-0.56391 3:-0.633929 5:1 6:-0.25 7:-0.666667 8:1 9:1 10:-0.940299 11:-1 13:-0.58 14:-0.99986 
-1 1:1 2:-0.60391 3:-0.839286 5:-0.692308 7:-0.964912 8:-1 9:-1 10:-1 11:1 13:-0.36 14:-0.92 
+1 1:-1 2:-0.859549 3:-0.339286 5:0.538462 6:-0.25 7:-0.915088 8:1 9:1 10:-0.880597 11:-1 13:-0.94 14:-0.9892 
+1 1:-1 2:-0.714286 3:-0.580357 5:0.538462 6:-0.25 7:-0.777544 8:1 9:1 10:-0.701493 11:-1 13:-0.88 14:-0.9951 
-1 1:1 2:-0.704361 3:-0.872143 5:0.0769231 6:-0.25 7:-0.962105 8:-1 9:-1 10:-1 11:1 13:-0.864 14:-0.99998 
+1 1:1 2:-0.561504 3:-0.642857 5:0.230769 6:-0.25 7:-0.22807 8:1 9:-1 10:-1 11:1 13:-0.93 14:-1 
-1 1:1 2:-0.641504 3:-0.842143 4:-1 5:-0.230769 6:-0.25 7:-0.719298 8:1 9:-1 10:-1 11:-1 13:-0.812 14:-1 
-1 1:-1 2:-0.553985 3:-0.881071 5:0.538462 6:-0.25 7:-0.830526 8:1 9:-1 10:-1 11:1 13:-0.56 14:-1 
-1 1:1 2:-0.724211 3:-0.773929 4:-1 5:0.0769231 6:-0.25 7:-0.988421 8:-1 9:-1 10:-1 11:-1 13:-0.84 14:-0.97884 
-1 1:-1 2:-0.676692 3:-0.925714 4:-1 5:-1 6:-1 7:-0.964912 8:1 9:1 10:-0.910448 11:-1 13:-0.82 14:-0.99706 
-1 1:1 2:-0.669173 3:-0.961429 5:-0.0769231 6:-0.25 7:-0.929825 8:-1 9:-1 10:-1 11:1 13:-0.88 14:-0.99998 
+1 1:1 2:-0.451128 3:-0.875 4:-1 5:0.384615 6:0.75 7:-0.997193 8:1 9:-1 10:-1 11:1 13:-0.607 14:-1 
-1 1:1 2:0.0324813 3:-0.732143 5:-0.692308 7:-0.929825 8:-1 9:-1 10:-1 11:-1 13:-0.9 14:-0.99996 
+1 1:-1 2:-0.558797 3:-0.75 5:0.230769 6:-0.25 7:-0.941404 8:1 9:-1 10:-1 11:-1 12:-1 13:-0.72 14:-1 
-1 1:1 2:-0.649023 3:-0.961429 5:0.230769 6:-0.25 7:-0.988421 8:-1 9:1 10:-0.970149 11:-1 13:-0.728 14:-0.99112 
-1 1:1 2:-0.854737 3:-0.265 5:-1 6:-1 7:-0.970877 8:-1 9:-1 10:-1 11:-1 13:-0.92 14:-1 
-1 1:1 2:-0.761805 3:-0.916786 4:-1 5:-0.538462 6:-0.25 7:-0.824561 8:1 9:1 10:-0.970149 11:-1 13:-0.82 14:-0.9996 
-1 1:1 2:-0.674286 3:-0.910714 5:0.0769231 6:-0.25 7:-0.982456 8:-1 9:-1 10:-1 11:-1 13:-0.89 14:-1 
-1 1:1 2:-0.922406 3:-0.708214 5:-0.692308 6:0.75 7:-0.970877 8:-1 9:-1 10:-1 11:1 13:-0.88 14:-1 
-1 1:1 2:-0.609023 3:-0.857143 5:-0.846154 6:-0.25 7:-0.947368 8:-1 9:-1 10:-1 11:1 13:-0.92 14:-1 
+1 1:1 2:0.0351879 3:-0.75 5:-0.230769 6:-0.25 7:-0.754386 8:1 9:-1 10:-1 11:-1 12:-1 13:-0.77 14:-1 
-1 1:1 2:-0.706767 3:-0.803571 5:-1 6:-1 7:-0.684211 8:-1 9:-1 10:-1 11:-1 13:-0.84 14:-0.9995 
+1 1:-1 2:-0.180451 3:-0.854286 4:-1 5:0.538462 6:0.75 7:-0.991228 8:1 9:1 10:-0.313433 11:1 13:-0.545 14:-0.97528 
+1 1:1 2:-0.35579 3:0.794643 5:1 6:0.75 7:-0.885965 8:1 9:1 10:-0.970149 11:1 13:-0.485 14:-0.99 
-1 1:1 2:-0.699248 3:-0.142857 5:0.0769231 6:-0.25 7:-0.853684 8:-1 9:-1 10:-1 11:-1 12:-1 13:-0.92 14:-1 
-1 1:1 2:-0.85203 3:-0.642857 5:0.538462 6:-0.25 7:-0.973684 8:1 9:1 10:-0.940299 11:-1 13:-1 14:-0.99924 
-1 1:1 2:-0.501353 3:-0.964286 5:-0.846154 6:0.75 7:-0.994035 8:-1 9:-1 10:-1 11:1 12:-1 13:-0.748 14:-1 
-1 1:-1 2:-0.819549 3:-0.946429 5:0.0769231 6:-0.25 7:-0.944211 8:1 9:1 10:-0.850746 11:1 13:-0.86 14:-0.9999 
-1 1:1 2:-0.626466 3:-0.940357 5:0.846154 6:-0.25 7:-0.918246 8:-1 9:-1 10:-1 11:-1 13:-0.9 14:-1 
-1 1:1 2:-0.548872 3:-0.892857 4:-1 5:0.0769231 6:-0.25 7:-0.894737 8:1 9:-1 10:-1 11:1 13:-1 14:-0.9955 
+1 1:1 2:-0.551278 3:-0.333214 5:0.538462 6:0.75 7:-0.602456 8:1 9:1 10:-0.820896 11:-1 13:-0.619 14:-0.99664 
+1 1:1 2:-0.631579 3:-0.928571 5:0.538462 6:-0.25 7:-0.877193 8:1 9:-1 10:-1 11:1 13:-0.72 14:-1 
-1 1:1 2:-0.706767 3:-0.773929 4:-1 5:-0.538462 6:-0.25 7:-0.970877 8:-1 9:1 10:-0.970149 11:1 13:-0.72 14:-0.9984 
-1 1:1 2:-0.621654 3:-0.0714286 5:0.384615 6:-0.75 7:-1 8:-1 9:-1 10:-1 11:1 13:-0.86 14:-0.9778 
+1 1:1 2:0.220451 3:-0.517857 5:0.0769231 6:0.75 7:-0.815789 8:1 9:1 10:-0.671642 11:1 13:-1 14:-0.99432 
-1 1:1 2:-0.46406 3:-0.973214 5:-0.846154 6:-0.25 7:-0.938596 8:1 9:-1 10:-1 11:1 12:-1 13:-0.072 14:-1 
-1 1:-1 2:-0.654135 3:-0.107143 5:-0.846154 6:-0.25 7:-0.929825 8:-1 9:-1 10:-1 11:1 13:-0.82 14:-0.97876 
+1 1:1 2:-0.41594 3:-0.773929 4:-1 5:1 6:-0.25 7:-0.777895 8:1 9:1 10:-0.910448 11:1 13:-0.62 14:-1 
-1 1:1 2:-0.225564 3:-0.883929 5:0.0769231 6:-0.25 7:-0.894737 8:-1 9:-1 10:-1 11:-1 13:-1 14:-0.99368 
-1 1:-1 2:-0.882105 3:-1 4:-1 5:-0.384615 6:-1 7:-1 8:-1 9:-1 10:-1 11:-1 13:-0.914 14:-1 
+1 1:1 2:-0.694135 3:-0.9525 5:0.0769231 6:-0.25 7:-0.988421 8:-1 9:-1 10:-1 11:-1 13:-0.9 14:-1 
+1 1:1 2:-0.611429 3:-0.806429 4:-1 5:0.846154 6:-0.25 7:-0.631579 8:1 9:1 10:-0.970149 11:-1 13:-0.789 14:-1 
-1 1:-1 2:-0.736842 3:-0.970357 5:-0.692308 6:-0.25 7:-0.976491 8:-1 9:-1 10:-1 11:1 12:-1 13:-0.856 14:-1 
+1 1:1 2:-0.212932 3:-0.961429 4:-1 5:-0.230769 6:-0.25 7:-0.964912 8:1 9:1 10:-0.910448 11:-1 13:-0.8 14:-0.98 
+1 1:-1 2:-0.629173 3:-0.381071 5:-0.230769 6:-0.25 7:-0.900702 8:1 9:-1 10:-1 11:-1 13:-0.84 14:-0.997 
-1 1:1 2:-0.81203 3:-1 5:-0.846154 6:-0.25 7:-0.964912 8:-1 9:-1 10:-1 11:-1 13:-0.856 14:-1 
-1 1:1 2:-0.46406 3:-0.714286 4:-1 5:-0.692308 6:-0.25 7:-0.994035 8:-1 9:-1 10:-1 11:1 13:-0.589 14:-1 
-1 1:1 2:-0.609023 3:-0.678571 4:-1 5:0.0769231 7:-0.824561 8:-1 9:-1 10:-1 11:-1 13:-0.8 14:-0.9758 
-1 1:-1 2:-0.66406 3:-0.910714 5:-1 6:-1 7:-1 8:1 9:-1 10:-1 11:-1 13:-0.92 14:-1 
-1 1:-1 2:-0.443609 3:-0.892857 5:0.0769231 6:-0.25 7:-0.982456 8:-1 9:-1 10:-1 11:1 13:-0.628 14:-0.99756 
-1 1:1 2:-0.882105 3:-0.681429 5:0.0769231 6:-0.25 7:-0.982456 8:-1 9:-1 10:-1 11:-1 12:-1 13:-0.92 14:-1 
+1 1:-1 2:-0.278195 3:-0.607143 5:0.538462 6:-0.25 7:-0.991228 8:1 9:-1 10:-1 11:1 13:-0.772 14:-1 
+1 1:1 2:-0.731729 3:-0.818571 4:-1 5:0.0769231 6:0.75 7:-0.818596 8:1 9:-1 10:-1 11:-1 13:-1 14:-1 
-1 1:-1 2:-0.874586 3:-0.270714 5:-1 6:-1 7:-1 8:-1 9:-1 10:-1 11:-1 13:-1 14:-0.999 
+1 1:1 2:-0.679098 3:-0.118929 5:0.538462 6:0.75 7:-0.888772 8:1 9:-1 10:-1 11:1 13:-0.88 14:-1 
+1 1:-1 2:-0.639098 3:-0.964286 5:0.0769231 6:0.75 7:-0.938596 8:1 9:-1 10:-1 11:1 13:-0.509 14:-1 
-1 1:1 2:-0.626466 3:-0.107143 4:-1 5:-0.538462 6:0.75 7:-0.912281 8:-1 9:-1 10:-1 11:1 13:-1 14:-0.99966 
-1 1:-1 2:-0.729323 3:-0.559643 5:-0.230769 6:-0.25 7:-0.988421 8:-1 9:-1 10:-1 11:-1 13:-0.78 14:-0.98 
-1 1:1 2:-0.721805 3:-0.946429 5:-0.0769231 6:-0.25 7:-0.964912 8:1 9:-1 10:-1 11:1 12:-1 13:-0.68 14:-1 
-1 1:1 2:-0.641504 3:-0.979286 4:-1 5:0.0769231 6:-0.25 7:-0.894737 8:-1 9:-1 10:-1 11:1 13:-0.84 14:-1 
+1 1:1 2:0.0475189 3:-0.985357 4:-1 5:-0.538462 6:-0.25 7:-0.982456 8:1 9:1 10:-0.671642 11:-1 13:-0.62 14:-0.94536 
-1 1:1 2:-0.776842 3:-1 5:0.0769231 6:-0.25 7:-0.964912 8:-1 9:-1 10:-1 11:1 12:-1 13:-1 14:-1 
-1 1:1 2:-0.353383 3:0.178571 4:-1 5:0.0769231 6:-0.25 7:-0.719298 8:1 9:-1 10:-1 11:-1 13:-0.92 14:-1 
+1 1:-1 2:-0.724211 3:-0.1725 5:0.846154 6:-0.25 7:-0.997193 8:1 9:-1 10:-1 11:-1 13:-0.92 14:-0.97302 
-1 1:-1 2:0.0351879 3:-0.904643 5:-0.692308 6:0.5 7:-0.976491 8:-1 9:-1 10:-1 11:-1 13:-1 14:-0.9976 
+1 1:1 2:-0.120301 3:-0.979286 4:-1 5:0.846154 6:0.75 7:-0.877193 8:1 9:1 10:-0.761194 11:-1 13:-0.9 14:-0.9925 
+1 1:1 2:-0.46406 3:-0.25 5:1 6:-0.25 7:-0.54386 8:1 9:-1 10:-1 11:-1 13:-1 14:-1 
-1 1:1 2:-0.79188 3:-0.970357 5:0.0769231 6:-0.25 7:-0.991228 8:-1 9:-1 10:-1 11:-1 13:-1 14:-0.99912 
+1 1:-1 2:-0.847218 3:-0.318571 5:-0.230769 6:-0.25 7:-0.994035 8:1 9:-1 10:-1 11:-1 13:-0.9 14:-1 
+1 1:-1 2:-0.588872 3:0.0357143 5:1 6:0.75 7:-0.783509 8:1 9:1 10:-0.970149 11:-1 13:-0.88 14:-0.99978 
+1 1:1 2:-0.180451 3:-0.997143 5:0.384615 6:-0.25 7:-0.997193 8:-1 9:1 10:-0.970149 11:-1 12:-1 13:-0.44 14:-1 
